# Supplementary material for: Do tradeoffs structure antibiotic inhibition, resistance, and resource use among soil-borne Streptomyces?
Source: BMC Evol Biol. 2015 Sep 15;15:186. doi: 10.1186/s12862-015-0470-6 (PMC4570699; doi:10.1186/s12862-015-0470-6)
Supplement: Additional file 1: — Linear regression analysis of inhibition or resistance zone sizes with growth efficiency or niche width for only those Streptomyces able to inhibit or resist a given standard test isolate. (PDF 270 kb) [file 12862_2015_470_MOESM1_ESM.pdf]

<?xml version="1.0" encoding="UTF-8" standalone="no"?><!DOCTYPE Article PUBLIC "-//Springer-Verlag//DTD A++ V2.4//EN" "http://devel.springer.de/A++/V2.4/DTD/A++V2.4.dtd"><Article OutputMedium="Online" ID="s12862-015-0470-6"><ArticleInfo Language="En" ArticleType="OriginalPaper" NumberingStyle="Unnumbered" TocLevels="0" ContainsESM="No" OutputMedium="Online" ArticleCitation="ArticleSequenceNumber"><ArticleID>470</ArticleID><ArticleDOI>10.1186/s12862-015-0470-6</ArticleDOI><ArticleSequenceNumber>0</ArticleSequenceNumber><ArticleTitle Language="En" OutputMedium="All">Do tradeoffs structure antibiotic inhibition, resistance, and resource use among soil-borne <Emphasis Type="Italic">Streptomyces</Emphasis>?</ArticleTitle><ArticleCategory>Research article</ArticleCategory><ArticleFirstPage>1</ArticleFirstPage><ArticleLastPage>11</ArticleLastPage><ArticleHistory><RegistrationDate><Year>2015</Year><Month>8</Month><Day>26</Day></RegistrationDate><Received><Year>2015</Year><Month>5</Month><Day>21</Day></Received><Accepted><Year>2015</Year><Month>8</Month><Day>27</Day></Accepted><OnlineDate><Year><?InsertOnReleaseOF OFYear?></Year><Month><?InsertOnReleaseOF OFMonth?></Month><Day><?InsertOnReleaseOF OFDay?></Day></OnlineDate></ArticleHistory><ArticleFundingInformation><Fund><FunderName FundRefID="http://dx.doi.org/10.13039/100000199">U.S. Department of Agriculture</FunderName><GrantNumber GrantRecipient="Au2" Type="FundRef">2011-67019-30200</GrantNumber><GrantNumber GrantRecipient="Au2" Type="FundRef">2011-67019-30330</GrantNumber><GrantNumber GrantRecipient="Au2" Type="FundRef">2006-04464</GrantNumber></Fund><Fund><FunderName FundRefID="http://dx.doi.org/10.13039/100000001">National Science Foundation</FunderName><GrantNumber GrantRecipient="Au2" Type="FundRef">9977907</GrantNumber><GrantNumber GrantRecipient="Au2" Type="FundRef">DEB-0080382</GrantNumber></Fund><Fund><FunderName FundRefID="">Minnesota Agricultural Experiment Station</FunderName></Fund></ArticleFundingInformation><ArticleCopyright><CopyrightHolderName>Schlatter and Kinkel.</CopyrightHolderName><CopyrightYear>2015</CopyrightYear><License Type="OpenAccess" SubType="CC BY + CC0" Version="4.0"><SimplePara><Emphasis Type="Bold">Open Access</Emphasis>This article is distributed under the terms of the Creative Commons Attribution 4.0 International License (<ExternalRef><RefSource>http://creativecommons.org/licenses/by/4.0/</RefSource><RefTarget TargetType="URL" Address="http://creativecommons.org/licenses/by/4.0/"/></ExternalRef>), which permits unrestricted use, distribution, and reproduction in any medium, provided you give appropriate credit to the original author(s) and the source, provide a link to the Creative Commons license, and indicate if changes were made. The Creative Commons Public Domain Dedication waiver (<ExternalRef><RefSource>http://creativecommons.org/publicdomain/zero/1.0/</RefSource><RefTarget TargetType="URL" Address="http://creativecommons.org/publicdomain/zero/1.0/"/></ExternalRef>) applies to the data made available in this article, unless otherwise stated.</SimplePara></License></ArticleCopyright><ArticleGrants Type="OpenChoice"><MetadataGrant Grant="OpenAccess"/><AbstractGrant Grant="OpenAccess"/><BodyPDFGrant Grant="OpenAccess"/><BodyHTMLGrant Grant="OpenAccess"/><BibliographyGrant Grant="OpenAccess"/><ESMGrant Grant="OpenAccess"/></ArticleGrants><ArticleContext><JournalID>12862</JournalID><VolumeIDStart><?InsertByIssueBuilding VolumeIDStart?></VolumeIDStart><VolumeIDEnd><?InsertByIssueBuilding VolumeIDEnd?></VolumeIDEnd><IssueIDStart><?InsertByIssueBuilding IssueIDStart?></IssueIDStart><IssueIDEnd><?InsertByIssueBuilding IssueIDEnd?></IssueIDEnd></ArticleContext></ArticleInfo><ArticleHeader><AuthorGroup><Author AffiliationIDS="Aff1"><AuthorName><GivenName>Daniel</GivenName><GivenName>C.</GivenName><FamilyName>Schlatter</FamilyName></AuthorName></Author><Author AffiliationIDS="Aff1" CorrespondingAffiliationID="Aff1" ID="Au2" ><AuthorName><GivenName>Linda</GivenName><GivenName>L.</GivenName><FamilyName>Kinkel</FamilyName></AuthorName><Contact><Phone>1-612-624-2253</Phone><Email>kinkel@umn.edu</Email></Contact></Author><Affiliation ID="Aff1"><OrgDivision>Department of Plant Pathology</OrgDivision><OrgName>University of Minnesota</OrgName><OrgAddress><Street>1991 Upper Buford Circle</Street><City>Saint Paul</City><State>MN</State><Postcode>55108</Postcode><Country>USA</Country></OrgAddress></Affiliation></AuthorGroup><Abstract Language="En" OutputMedium="All" ID="Abs1"><Heading>Abstract</Heading><AbstractSection ID="ASec1"><Heading>Background</Heading><Para ID="Par1">Tradeoffs among competing traits are believed to be crucial to the maintenance of diversity in complex communities. The production of antibiotics to inhibit competitors and resistance to antibiotic inhibition are two traits believed to be critical to microbial fitness in natural habitats, yet data on costs or tradeoffs associated with these traits are limited. In this work we characterized tradeoffs between antibiotic inhibition or resistance capacities and growth efficiencies or niche widths for a broad collection of <Emphasis Type="Italic">Streptomyces</Emphasis> from soil.</Para></AbstractSection><AbstractSection ID="ASec2"><Heading>Results</Heading><Para ID="Par2"><Emphasis Type="Italic">Streptomyces</Emphasis> isolates tended to have either very little or very high inhibitory capacity. In contrast, <Emphasis Type="Italic">Streptomyces</Emphasis> isolates were most commonly resistant to antibiotic inhibition by an intermediate number of other isolates. <Emphasis Type="Italic">Streptomyces</Emphasis> with either very high antibiotic inhibitory or resistance capacities had less efficient growth and utilized a smaller number of resources for growth (smaller niche width) than those with low inhibition or resistance capacities, suggesting tradeoffs between antibiotic inhibitory or resistance and resource use phenotypes.</Para></AbstractSection><AbstractSection ID="ASec3"><Heading>Conclusions</Heading><Para ID="Par3">This work suggests that life-history tradeoffs may be crucial to the maintenance of the vast diversity of antibiotic inhibitory and resistance phenotypes found among <Emphasis Type="Italic">Streptomyces</Emphasis> in natural communities.</Para></AbstractSection></Abstract></ArticleHeader><Body><Section1 ID="Sec1"><Heading>Background</Heading><Para ID="Par4">Soil bacteria produce an astounding array of antimicrobial compounds [<CitationRef CitationID="CR1">1</CitationRef>] Antibiotic production is believed to provide a fitness benefit to the producer by inhibiting the growth of competing microbes [<CitationRef CitationID="CR2">2</CitationRef>–<CitationRef CitationID="CR5">5</CitationRef>]. In response, competitors may overcome inhibition by acquiring resistance to antibiotics through mutations or horizontal gene transfer [<CitationRef CitationID="CR6">6</CitationRef>, <CitationRef CitationID="CR7">7</CitationRef>]. Antibiotic inhibition and resistance phenotypes are extremely diverse in natural habitats and highly variable among soil bacteria [<CitationRef CitationID="CR4">4</CitationRef>, <CitationRef CitationID="CR8">8</CitationRef>]. However, how this diversity is maintained in soil microbial communities is not well understood. In particular, what limits the accumulation of antibiotic production and resistance genes among bacterial populations in soil?</Para><Para ID="Par5">Tradeoffs preclude an organism’s ability to optimize multiple traits [<CitationRef CitationID="CR9">9</CitationRef>, <CitationRef CitationID="CR10">10</CitationRef>]. It is commonly assumed that because antibiotic production and resistance generally require energy expenditure they are accompanied by tradeoffs with growth or other fitness components. As a result of tradeoffs, antibiotic-producing microbes are expected to be out-competed by non-producing counterparts in the absence of susceptible competitors [<CitationRef CitationID="CR11">11</CitationRef>–<CitationRef CitationID="CR13">13</CitationRef>]. Similarly, microbes that carry resistance to antibiotics are expected to be out-competed by susceptible counterparts in the absence of antibiotic-producing competitors [<CitationRef CitationID="CR11">11</CitationRef>, <CitationRef CitationID="CR13">13</CitationRef>, <CitationRef CitationID="CR14">14</CitationRef>]. Although tradeoffs between growth and antibiotic resistance have been studied in clinical settings [14}, the lack of analogous data for antibiotic production or resistance among naturally-occurring microbial populations limits our understanding of the dynamics of antibiotic inhibition and resistance within soil communities.</Para><Para ID="Par6">Tradeoffs associated with antibiotic production and resistance should be reflected in growth reductions for antibiotic-producing vs. non-producing bacteria in the absence of competition (ie. physiological tradeoffs; [<CitationRef CitationID="CR12">12</CitationRef>]) or, more generally, in negative relationships among distinct phenotypic traits (ie. life history tradeoffs; [<CitationRef CitationID="CR9">9</CitationRef>]). Since bacterial strains often produce and resist many antibiotics in tandem [<CitationRef CitationID="CR15">15</CitationRef>–<CitationRef CitationID="CR17">17</CitationRef>], tradeoffs that are important for the fitness of individuals are likely to encompass the total or cumulative profile of antibiotic production and resistance. For example, production of multiple antibiotic compounds is likely to require a greater total allocation of resources compared to production of a single antibiotic, whereas the costs of multiple resistances may depend on the specific resistance mechanisms (eg. multi-drug efflux pumps versus the accumulation of resistance mutations). At the same time, it has been hypothesized that the accumulation of antibiotic production and resistance among bacteria is driven by a coevolutionary arms race [<CitationRef CitationID="CR15">15</CitationRef>, <CitationRef CitationID="CR13">13</CitationRef>]. Arms race dynamics are hypothesized to result in extreme traits in populations [<CitationRef CitationID="CR18">18</CitationRef>]. For example, among microbial pathogen populations, arms race coevolution is considered to be responsible for the accumulation of virulence and resistance [<CitationRef CitationID="CR19">19</CitationRef>–<CitationRef CitationID="CR21">21</CitationRef>], and may also generate a preponderance of bacteria with highly antagonistic or resistant phenotypes [<CitationRef CitationID="CR13">13</CitationRef>]. However, there are few data on the distribution of cumulative antibiotic inhibition and resistance phenotypes among soil bacteria, and evidence for significant fitness tradeoffs associated with antibiotic inhibitory or resistance phenotypes is limited.</Para><Para ID="Par7"><Emphasis Type="Italic">Streptomyces</Emphasis> are filamentous, Gram-positive bacteria that are prolific producers of antibiotics and a significant reservoir of antibiotic resistance in soils [<CitationRef CitationID="CR16">16</CitationRef>, <CitationRef CitationID="CR17">17</CitationRef>]. Antibiotic production by <Emphasis Type="Italic">Streptomyces</Emphasis> is often dependent on resource availability [<CitationRef CitationID="CR22">22</CitationRef>–<CitationRef CitationID="CR24">24</CitationRef>]. Moreover, <Emphasis Type="Italic">Streptomyces</Emphasis> vary extensively in the resources on which they can grow and in their relative growth efficiencies on different resources [<CitationRef CitationID="CR25">25</CitationRef>], suggesting the potential for diverse competitive strategies. Fitness tradeoffs associated with antibiotic inhibition or resistance may limit the evolution of <Emphasis Type="Italic">Streptomyces</Emphasis> that are both highly antagonistic and growth efficient on a wide array of resources. However, specific data on the relationships among <Emphasis Type="Italic">Streptomyces</Emphasis> resource use, antibiotic inhibition, and antibiotic resistance from natural settings are needed to understand the potential for fitness tradeoffs to constrain the accumulation of antibiotic inhibition or resistance capacities in soil microbes.</Para><Para ID="Par8">In this work we hypothesize that there are life-history tradeoffs associated with the antibiotic inhibitory and resistance capacities of <Emphasis Type="Italic">Streptomyces</Emphasis> within natural soil populations. We examine patterns of antibiotic inhibition and resistance phenotypes among <Emphasis Type="Italic">n</Emphasis> = 263 <Emphasis Type="Italic">Streptomyces</Emphasis> isolates from natural soil settings in relation to their resource use on 95 sole carbon sources. Specifically, we 1) characterize antibiotic inhibition and resistance among <Emphasis Type="Italic">Streptomyces</Emphasis> and quantify inhibition and resistance phenotypes among isolates; 2) determine relationships between antibiotic inhibition, resistance, and resource use among <Emphasis Type="Italic">Streptomyces</Emphasis> isolates; and 3) explore evidence for tradeoffs among <Emphasis Type="Italic">Streptomyces</Emphasis> exhibiting distinct inhibition and resistance strategies. These data suggest that tradeoffs may be critical in structuring antibiotic production and resistance strategies among <Emphasis Type="Italic">Streptomyces</Emphasis> in soil.</Para></Section1><Section1 ID="Sec2"><Heading>Methods</Heading><Section2 ID="Sec3"><Heading>Soil sampling, processing, and isolation</Heading><Para ID="Par9">Soil samples were collected at the University of Minnesota Cedar Creek Ecosystem Science Reserve (<ExternalRef><RefSource>www.cedarcreek.umn.edu</RefSource><RefTarget TargetType="URL" Address="http://www.cedarcreek.umn.edu"/></ExternalRef>), a NSF Long-Term Ecological Research site as described previously [<CitationRef CitationID="CR4">4</CitationRef>]. Three soil cores were taken from random locations within 1 m<Superscript>2</Superscript> sections of two plots in experiment E001 (plots 08-A and 10-D) for a total of six soil cores. Soil cores were transported to the lab on ice and processed immediately. Soils were dried overnight under a double-layer of sterile cheesecloth, serially diluted in phosphate buffer (0.5 M K<Subscript>2</Subscript>HPO<Subscript>4</Subscript>, 0.4 M KH<Subscript>2</Subscript>PO<Subscript>4</Subscript>, pH = 7.0), and plated on oatmeal agar as described in Davelos et al. [<CitationRef CitationID="CR4">4</CitationRef>]. Plates were incubated at 28C for 7 days and <Emphasis Type="Italic">Streptomyces</Emphasis> densities were estimated based on characteristic colony morphology. <Emphasis Type="Italic">Streptomyces</Emphasis> colonies were randomly picked with a sterile toothpick, purified, and stored in 20 % glycerol at -80C for further study. Detailed information on soil collection, processing, and isolation is published elsewhere [<CitationRef CitationID="CR4">4</CitationRef>].</Para></Section2><Section2 ID="Sec4"><Heading>Characterization of <Emphasis Type="Italic">Streptomyces</Emphasis> antibiotic inhibition and resistance</Heading><Para ID="Par10"><Emphasis Type="Italic">Streptomyces</Emphasis> antibiotic inhibition and resistance profiles were determined against ten standard reference isolates described in Davelos et al. [<CitationRef CitationID="CR26">26</CitationRef>] Standard strains encompass genotypically and phenotypically diverse isolates collected from multiple locations in Minnesota. Moreover, these test stains differ in their antibiotic inhibition and resistance profiles so that they can differentiate up to 1024 different inhibition and resistance phenotypes in pair-wise assays [<CitationRef CitationID="CR26">26</CitationRef>]. Because <Emphasis Type="Italic">Streptomyces</Emphasis> inhibitory phenotypes may be adapted to inhibit local resource competitors at small spatial scales (within 1 m<Superscript>2</Superscript>; [<CitationRef CitationID="CR5">5</CitationRef>]) and isolates were collected from different multiple locations, standard test isolates provide an assessment of <Emphasis Type="Italic">Streptomyces</Emphasis> antibiotic inhibitory and resistance phenotypes that is independent from the location of origin of the tested isolates. <Emphasis Type="Italic">Streptomyces</Emphasis> isolates (<Emphasis Type="Italic">n</Emphasis> = 263) were characterized for antibiotic inhibition profiles by evaluating their ability to inhibit each standard isolate using an agar-overlay method [<CitationRef CitationID="CR4">4</CitationRef>]. Briefly, 10ul of spore suspensions (~10<Superscript>8</Superscript> spores/ml) were dotted onto 15 ml starch-casein agar (SCA). After incubation for 3 days at 28 C, isolates were killed by inverting each plate over a watch glass containing 4 ml chloroform. Plates were then left open in a laminar flow hood for 30 min to allow residual chloroform to evaporate, then overlaid with 15 ml of fresh 1 % water agar. After the agar solidified 100ul of each test standard spore stock (~10<Superscript>8</Superscript> spores/ml) was spread on the plate. Plates were incubated for 3 days at 28 C and the size of inhibition zones around dotted isolates were measured. Each <Emphasis Type="Italic">Streptomyces</Emphasis>-standard interaction was replicated three times and only inhibition zones greater than 1 mm were considered to be inhibitory. The same approach was used to characterize the collection of <Emphasis Type="Italic">Streptomyces</Emphasis> isolates for resistance to antibiotic inhibition by each standard isolate. Spatial variation in the inhibition and resistance characteristics of a subset of the isolates used in this work have been published previously [<CitationRef CitationID="CR4">4</CitationRef>], though their relationships with resource use have not been explored previously.</Para></Section2><Section2 ID="Sec5"><Heading>Resource use</Heading><Para ID="Par11">Resource use was evaluated on Biolog SF-P2 microplates (Biolog, Inc. Hayward, CA) using standard procedures as described in Schlatter et al. [<CitationRef CitationID="CR25">25</CitationRef>]. Measurement of growth in Biolog SF-P2 plates rely on the turbidity of each well (absorbance) as a measure of microbial growth, rather than a redox dye. Thus, growth measurements in Biolog SF-P2 plates offer a rapid and standardized means to quantify the cumulative reproductive output of <Emphasis Type="Italic">Streptomyces</Emphasis> isolates on a diverse array of sole carbon sources. Fresh spore suspensions of each <Emphasis Type="Italic">Streptomyces</Emphasis> isolate were quantified to an absorbance of 0.22 at 590 nm, diluted according to the manufacturer’s instructions, and inoculated into Biolog SF-P2 plates. Plates were incubated at 28 C for 3 days and the absorbance of each well was measured (590 nm). The absorbance (au) from the water control well was subtracted from all 95 substrate-containing wells. After correction, all wells with an absorbance &lt;0.005 were adjusted to 0 prior to analyses. We defined niche width as the number of substrates on which an isolate could grow (positive absorbance after adjustments). Growth efficiency was defined as the mean growth on used substrates (mean of absorbance values &gt;0). Variation in resource use of these isolates has been explored [<CitationRef CitationID="CR25">25</CitationRef>], yet their relationships with inhibition or resistance traits have not been previously evaluated.</Para></Section2><Section2 ID="Sec6"><Heading>Statistical analyses</Heading><Para ID="Par12">All statistical analyses were performed in the R statistical package (Version 3.0.2, [<CitationRef CitationID="CR27">27</CitationRef>]) or GraphPad Prism (Version 6; GraphPad Software, La Jolla California, USA). Spearman correlations and linear regression were used to test for relationships between <Emphasis Type="Italic">Streptomyces</Emphasis> inhibitory, resistance, and resource use phenotypes. Permutation tests (<Emphasis Type="Italic">n</Emphasis> = 10,000 permutations) were used for Spearman correlations to estimate the significance of relationships using the ‘coin’ package in R [<CitationRef CitationID="CR28">28</CitationRef>]. Student’s t-tests with Welch’s corrections were used to examine differences in resource use phenotypes between <Emphasis Type="Italic">Streptomyces</Emphasis> with antagonistic or resistant phenotypes and their non-antagonistic or resistant counterparts for each individual standard tested. Because antibiotic inhibitory phenotypes among <Emphasis Type="Italic">Streptomyces</Emphasis> fell into two distinct categories, those that did not inhibit any standards (non-inhibitors, <Emphasis Type="Italic">n</Emphasis> = 109) and those that inhibited all 10 standards (super-killers, <Emphasis Type="Italic">n</Emphasis> = 38), Student’s t-tests were used to compare differences in resource use of <Emphasis Type="Italic">Streptomyces</Emphasis> among these categories. Similarly, although antibiotic resistance was normally distributed, resource use among <Emphasis Type="Italic">Streptomyces</Emphasis> with low (resisting 3–5 standards, <Emphasis Type="Italic">n</Emphasis> = 58) and high (resisting 8–10 standards; <Emphasis Type="Italic">n</Emphasis> = 62) resistance capacities was also compared using Student’s t-tests. Further, the ability of <Emphasis Type="Italic">Streptomyces</Emphasis> belonging to high- versus low-inhibition or resistance categories to utilize each of the <Emphasis Type="Italic">n</Emphasis> = 95 individual carbon sources was compared using Pearson’s Chi-squared tests, where p-values &lt;0.05 after adjustment for multiple comparisons using an FDR correction were considered statistically significant.</Para></Section2></Section1><Section1 ID="Sec7"><Heading>Results</Heading><Section2 ID="Sec8"><Heading><Emphasis Type="Italic">Streptomyces</Emphasis> inhibition and resistance</Heading><Para ID="Par13"><Emphasis Type="Italic">Streptomyces</Emphasis> isolates varied in their abilities to inhibit and resist standard strains, consistent with previous work [<CitationRef CitationID="CR4">4</CitationRef>]. Patterns of inhibition were diverse: considering discrete inhibitory phenotypes (+/−) there were 57 unique inhibition profiles among the 263 isolates. Overall, individual <Emphasis Type="Italic">Streptomyces</Emphasis> inhibited an average of 3.1 standards, though this average increased to 5.3 standards when considering only <Emphasis Type="Italic">Streptomyces</Emphasis> that could inhibit at least one standard. However, most isolates had either very little or very high inhibitory capacity, as reflected in the distinct bimodal distribution of isolate frequencies (Fig. <InternalRef RefID="Fig1">1a</InternalRef>). The majority of <Emphasis Type="Italic">Streptomyces</Emphasis> either lacked any inhibitory capacity (41 % of isolates did not inhibit any standard; Fig. <InternalRef RefID="Fig1">1a</InternalRef>) or had extremely broad inhibitory phenotypes (14 % of isolates inhibited all 10 standards; Fig. <InternalRef RefID="Fig1">1a</InternalRef>).<Figure ID="Fig1" Float="Yes" Category="Standard"><Caption Language="En"><CaptionNumber>Fig. 1</CaptionNumber><CaptionContent><SimplePara>Frequency distribution of cumulative antibiotic inhibition (<Emphasis Type="Italic">upper panel</Emphasis>) and resistance (<Emphasis Type="Italic">lower panel</Emphasis>) phenotypes of <Emphasis Type="Italic">Streptomyces</Emphasis> against standard test isolates</SimplePara></CaptionContent></Caption><MediaObject ID="MO1"><ImageObject FileRef="12862_2015_470_Fig1_HTML.gif" Format="GIF" Color="BlackWhite" Type="LinedrawHalftone" Rendition="HTML"/></MediaObject></Figure></Para><Para ID="Par14">Resistance phenotypes among <Emphasis Type="Italic">Streptomyces</Emphasis> were less diverse than inhibition phenotypes. Among 263 isolates there were 29 unique resistance profiles. <Emphasis Type="Italic">Streptomyces</Emphasis> isolates resisted 6.8 standards on average (Fig. <InternalRef RefID="Fig1">1b</InternalRef>). Resistance to inhibition by multiple standards was common among soil-borne <Emphasis Type="Italic">Streptomyces</Emphasis>. Every standard inhibited at least two <Emphasis Type="Italic">Streptomyces</Emphasis> isolates, verifying that each standard had some inhibitory capacity. Although every <Emphasis Type="Italic">Streptomyces</Emphasis> isolate resisted inhibition by at least three standards, only a small proportion (5 %) of isolates was resistant to all ten standards. In contrast to the bimodal distribution of inhibitory phenotypes, frequencies of resistance were approximately normally distributed among isolates and fell around a distinct mode (median = 7, mode = 7).</Para><Para ID="Par15"><Emphasis Type="Italic">Streptomyces</Emphasis> capacities to inhibit and resist standards were weakly correlated. There was a marginally significant positive correlation between the number of standards inhibited and the number of standards resisted among individual <Emphasis Type="Italic">Streptomyces</Emphasis> (Spearman’s <Emphasis Type="Italic">ρ</Emphasis> = 0.15, <Emphasis Type="Italic">p</Emphasis> = 0.012, <Emphasis Type="Italic">z</Emphasis> = 2.49), suggesting that <Emphasis Type="Italic">Streptomyces</Emphasis> with broad antibiotic inhibition capacities are slightly more likely to have broad resistance capacities.</Para></Section2><Section2 ID="Sec9"><Heading>Inhibition-resource use tradeoffs</Heading><Para ID="Par16"><Emphasis Type="Italic">Streptomyces</Emphasis> with the ability to inhibit specific standards versus those with no apparent inhibitory capacity against that standard sometimes differed in growth efficiency or niche width (Table <InternalRef RefID="Tab1">1</InternalRef>). Inhibitors of standards LK4-2, LK6-14, LK10-3, and DL87 had significantly smaller growth efficiencies than isolates unable to inhibit each of these standards. Similarly, inhibitors of standards LK4-2, LK4-21, LK6-14, LK10-3, and DL87 had significantly smaller niche widths than non-inhibitors. Overall, <Emphasis Type="Italic">Streptomyces</Emphasis> able to inhibit specific standards consistently had smaller niche widths than non-inhibitors against those standards (ten of ten standards), though differences were only significant for four of the ten standards. These results suggest that having inhibitory capacity towards a standard sometimes comes at a cost with respect to growth efficiency or niche width, though costs may vary among antibiotics.<Table ID="Tab1" Float="Yes"><Caption Language="En"><CaptionNumber>Table 1</CaptionNumber><CaptionContent><SimplePara>Differences in growth efficiency and niche widths among <Emphasis Type="Italic">Streptomyces</Emphasis> inhibitory and non-inhibitory towards individual standards</SimplePara></CaptionContent></Caption><tgroup cols="11" align="left"><colspec colnum="1" colname="c1" align="left"/><colspec colnum="2" colname="c2" align="left"/><colspec colnum="3" colname="c3" align="left"/><colspec colnum="4" colname="c4" align="left"/><colspec colnum="5" colname="c5" align="left"/><colspec colnum="6" colname="c6" align="left"/><colspec colnum="7" colname="c7" align="left"/><colspec colnum="8" colname="c8" align="left"/><colspec colnum="9" colname="c9" align="left"/><colspec colnum="10" colname="c10" align="left"/><colspec colnum="11" colname="c11" align="left"/><tbody><thead><row><entry colname="c1"/><entry namest="c2" nameend="c6"><SimplePara>Growth Efficiency (± SD)</SimplePara></entry><entry namest="c7" nameend="c11"><SimplePara>Niche Width (± SD)</SimplePara></entry><entry colname="c11"/></row><row><entry colname="c1"><SimplePara>Standard</SimplePara></entry><entry colname="c2"><SimplePara>Inhibitor</SimplePara></entry><entry colname="c3"><SimplePara>Non-Inhibitor</SimplePara></entry><entry colname="c4"><SimplePara>df</SimplePara></entry><entry colname="c5"><SimplePara>t-val</SimplePara></entry><entry colname="c6"><SimplePara>p-val</SimplePara></entry><entry colname="c7"><SimplePara>Inhibitor</SimplePara></entry><entry colname="c8"><SimplePara>Non-Inhibitor</SimplePara></entry><entry colname="c9"><SimplePara>df</SimplePara></entry><entry colname="c10"><SimplePara>t-val</SimplePara></entry><entry colname="c11"><SimplePara>p-val</SimplePara></entry></row></thead><row><entry colname="c1"><SimplePara>LK2-12</SimplePara></entry><entry colname="c2"><SimplePara>0.067 ± 0.015</SimplePara></entry><entry colname="c3"><SimplePara>0.066 ± 0.016</SimplePara></entry><entry colname="c4"><SimplePara>158.1</SimplePara></entry><entry colname="c5"><SimplePara>0.52</SimplePara></entry><entry colname="c6"><SimplePara>0.605</SimplePara></entry><entry colname="c7"><SimplePara>70.5 ± 16.9</SimplePara></entry><entry colname="c8"><SimplePara>74.0 ± 16.2</SimplePara></entry><entry colname="c9"><SimplePara>140.9</SimplePara></entry><entry colname="c10"><SimplePara>−1.55</SimplePara></entry><entry colname="c11"><SimplePara>0.123</SimplePara></entry></row><row><entry colname="c1"><SimplePara>LK4-2</SimplePara></entry><entry colname="c2"><SimplePara>0.062 ± 0.012</SimplePara></entry><entry colname="c3"><SimplePara>0.068 ± 0.016</SimplePara></entry><entry colname="c4"><SimplePara>117.7</SimplePara></entry><entry colname="c5"><SimplePara>−3.17</SimplePara></entry><entry colname="c6"><SimplePara>0.002</SimplePara></entry><entry colname="c7"><SimplePara>67.1 ± 18.2</SimplePara></entry><entry colname="c8"><SimplePara>74.7 ± 15.5</SimplePara></entry><entry colname="c9"><SimplePara>82.5</SimplePara></entry><entry colname="c10"><SimplePara>−2.89</SimplePara></entry><entry colname="c11"><SimplePara>0.005</SimplePara></entry></row><row><entry colname="c1"><SimplePara>LK4-16</SimplePara></entry><entry colname="c2"><SimplePara>0.068 ± 0.017</SimplePara></entry><entry colname="c3"><SimplePara>0.066 ± 0.015</SimplePara></entry><entry colname="c4"><SimplePara>84.4</SimplePara></entry><entry colname="c5"><SimplePara>0.58</SimplePara></entry><entry colname="c6"><SimplePara>0.562</SimplePara></entry><entry colname="c7"><SimplePara>69.9 ± 18.0</SimplePara></entry><entry colname="c8"><SimplePara>74.1 ± 15.9</SimplePara></entry><entry colname="c9"><SimplePara>84.8</SimplePara></entry><entry colname="c10"><SimplePara>−1.63</SimplePara></entry><entry colname="c11"><SimplePara>0.108</SimplePara></entry></row><row><entry colname="c1"><SimplePara>LK4-20</SimplePara></entry><entry colname="c2"><SimplePara>0.066 ± 0.016</SimplePara></entry><entry colname="c3"><SimplePara>0.067 ± 0.015</SimplePara></entry><entry colname="c4"><SimplePara>132.6</SimplePara></entry><entry colname="c5"><SimplePara>−0.34</SimplePara></entry><entry colname="c6"><SimplePara>0.737</SimplePara></entry><entry colname="c7"><SimplePara>71.9 ± 16.3</SimplePara></entry><entry colname="c8"><SimplePara>74.1 ± 16.1</SimplePara></entry><entry colname="c9"><SimplePara>133.4</SimplePara></entry><entry colname="c10"><SimplePara>−0.99</SimplePara></entry><entry colname="c11"><SimplePara>0.325</SimplePara></entry></row><row><entry colname="c1"><SimplePara>LK4-21</SimplePara></entry><entry colname="c2"><SimplePara>0.065 ± 0.015</SimplePara></entry><entry colname="c3"><SimplePara>0.067 ± 0.015</SimplePara></entry><entry colname="c4"><SimplePara>114.1</SimplePara></entry><entry colname="c5"><SimplePara>−0.69</SimplePara></entry><entry colname="c6"><SimplePara>0.490</SimplePara></entry><entry colname="c7"><SimplePara>70.0 ± 17.4</SimplePara></entry><entry colname="c8"><SimplePara>74.3 ± 16.1</SimplePara></entry><entry colname="c9"><SimplePara>106.6</SimplePara></entry><entry colname="c10"><SimplePara>−1.77</SimplePara></entry><entry colname="c11"><SimplePara>0.080</SimplePara></entry></row><row><entry colname="c1"><SimplePara>LK4-24</SimplePara></entry><entry colname="c2"><SimplePara>0.066 ± 0.015</SimplePara></entry><entry colname="c3"><SimplePara>0.067 ± 0.015</SimplePara></entry><entry colname="c4"><SimplePara>149.4</SimplePara></entry><entry colname="c5"><SimplePara>−0.51</SimplePara></entry><entry colname="c6"><SimplePara>0.614</SimplePara></entry><entry colname="c7"><SimplePara>71.0 ± 16.9</SimplePara></entry><entry colname="c8"><SimplePara>74.0 ± 16.2</SimplePara></entry><entry colname="c9"><SimplePara>142.7</SimplePara></entry><entry colname="c10"><SimplePara>−1.31</SimplePara></entry><entry colname="c11"><SimplePara>0.191</SimplePara></entry></row><row><entry colname="c1"><SimplePara>LK6-14</SimplePara></entry><entry colname="c2"><SimplePara>0.063 ± 0.012</SimplePara></entry><entry colname="c3"><SimplePara>0.068 ± 0.016</SimplePara></entry><entry colname="c4"><SimplePara>158.2</SimplePara></entry><entry colname="c5"><SimplePara>−2.45</SimplePara></entry><entry colname="c6"><SimplePara>0.016</SimplePara></entry><entry colname="c7"><SimplePara>68.7 ± 16.8</SimplePara></entry><entry colname="c8"><SimplePara>74.7 ± 16.1</SimplePara></entry><entry colname="c9"><SimplePara>116.3</SimplePara></entry><entry colname="c10"><SimplePara>−2.59</SimplePara></entry><entry colname="c11"><SimplePara>0.011</SimplePara></entry></row><row><entry colname="c1"><SimplePara>LK10-3</SimplePara></entry><entry colname="c2"><SimplePara>0.063 ± 0.012</SimplePara></entry><entry colname="c3"><SimplePara>0.068 ± 0.016</SimplePara></entry><entry colname="c4"><SimplePara>144.3</SimplePara></entry><entry colname="c5"><SimplePara>−2.40</SimplePara></entry><entry colname="c6"><SimplePara>0.018</SimplePara></entry><entry colname="c7"><SimplePara>68.6 ± 16.5</SimplePara></entry><entry colname="c8"><SimplePara>74.5 ± 16.2</SimplePara></entry><entry colname="c9"><SimplePara>108.8</SimplePara></entry><entry colname="c10"><SimplePara>−2.50</SimplePara></entry><entry colname="c11"><SimplePara>0.014</SimplePara></entry></row><row><entry colname="c1"><SimplePara>DL87</SimplePara></entry><entry colname="c2"><SimplePara>0.063 ± 0.014</SimplePara></entry><entry colname="c3"><SimplePara>0.068 ± 0.016</SimplePara></entry><entry colname="c4"><SimplePara>209.4</SimplePara></entry><entry colname="c5"><SimplePara>−2.65</SimplePara></entry><entry colname="c6"><SimplePara>0.009</SimplePara></entry><entry colname="c7"><SimplePara>67.4 ± 17.3</SimplePara></entry><entry colname="c8"><SimplePara>76.2 ± 15.0</SimplePara></entry><entry colname="c9"><SimplePara>161.1</SimplePara></entry><entry colname="c10"><SimplePara>−4.09</SimplePara></entry><entry colname="c11"><SimplePara>&lt;0.001</SimplePara></entry></row><row><entry colname="c1"><SimplePara>DL93</SimplePara></entry><entry colname="c2"><SimplePara>0.067 ± 0.016</SimplePara></entry><entry colname="c3"><SimplePara>0.066 ± 0.015</SimplePara></entry><entry colname="c4"><SimplePara>87.7</SimplePara></entry><entry colname="c5"><SimplePara>0.25</SimplePara></entry><entry colname="c6"><SimplePara>0.806</SimplePara></entry><entry colname="c7"><SimplePara>70.1 ± 18.0</SimplePara></entry><entry colname="c8"><SimplePara>73.8 ± 16.0</SimplePara></entry><entry colname="c9"><SimplePara>83.1</SimplePara></entry><entry colname="c10"><SimplePara>−1.38</SimplePara></entry><entry colname="c11"><SimplePara>0.170</SimplePara></entry></row></tbody></tgroup><tfooter><SimplePara>Growth efficiency (±standard deviation) and niche width (±standard deviation) of inhibitory and non-inhibitory <Emphasis Type="Italic">Streptomyces</Emphasis> against individual standard isolates. Degrees of freedom, t-values, and p-values of t-tests between inhibitory and non-inhibitory <Emphasis Type="Italic">Streptomyces</Emphasis> are presented</SimplePara></tfooter></Table></Para><Para ID="Par17">Among <Emphasis Type="Italic">Streptomyces</Emphasis> that exhibited inhibitory capacities against particular standards, there were significant negative relationships between inhibition intensity (inhibition zone size) and growth efficiency for eight of ten standards (Fig. <InternalRef RefID="Fig2">2</InternalRef>). Among isolates that could inhibit a given standard, inhibition zone size explained from 6 to 19 % of the variation in growth efficiency. This suggests that <Emphasis Type="Italic">Streptomyces</Emphasis> with stronger inhibitory capacities are less growth efficient, consistent with the idea that producing greater quantities of antibiotic imposes a cost in growth efficiency. Further, variation in the slopes of relationships between inhibition intensity and growth efficiency (Additional file <InternalRef RefID="MOESM1">1</InternalRef>) suggests that the costs of increased inhibition, or antibiotic production, vary among different standards. Relationships between inhibition intensity and niche width were also consistently negative, though statistically significant for only 5 of the 10 standards (Additional file <InternalRef RefID="MOESM1">1</InternalRef>).<Figure ID="Fig2" Float="Yes" Category="Standard"><Caption Language="En"><CaptionNumber>Fig. 2</CaptionNumber><CaptionContent><SimplePara>Linear regression of growth efficiency and inhibition zone sizes among inhibitors of each of the 10 standard isolates</SimplePara></CaptionContent></Caption><MediaObject ID="MO2"><ImageObject FileRef="12862_2015_470_Fig2_HTML.gif" Format="GIF" Color="BlackWhite" Type="LinedrawHalftone" Rendition="HTML"/></MediaObject></Figure></Para><Para ID="Par18">Considering cumulative inhibitory capacity, or the total number of standards that a <Emphasis Type="Italic">Streptomyces</Emphasis> isolate could inhibit rather than the inhibition zone size against a given standard, the number of standards that an isolate inhibited was weakly but significantly negatively correlated with niche width (Fig. <InternalRef RefID="Fig3">3</InternalRef>; Spearman’s <Emphasis Type="Italic">ρ</Emphasis> = −0.16, <Emphasis Type="Italic">p</Emphasis> = 0.008, <Emphasis Type="Italic">z</Emphasis> = −2.64), but not growth efficiency (Fig. <InternalRef RefID="Fig3">3</InternalRef>; Spearman’s <Emphasis Type="Italic">ρ</Emphasis> = 0.008, <Emphasis Type="Italic">p</Emphasis> = 0.90, <Emphasis Type="Italic">z</Emphasis> = 0.13). Thus, isolates that inhibited a larger number of standards had smaller niche widths than those that inhibited fewer standards. However, correlations between total number of standards inhibited and niche width were weak, perhaps due to the variation in the costs of producing diverse antibiotics and inhibiting different standards. Notably, non-inhibitory isolates (inhibited none of the standards) and highly inhibitory ‘super-killers’ (inhibited all 10 standards) differed significantly in resource use. Super-killer <Emphasis Type="Italic">Streptomyces</Emphasis> had significantly smaller niche widths and grew less efficiently than non-inhibitors (Fig. <InternalRef RefID="Fig4">4</InternalRef>). Non-inhibitory <Emphasis Type="Italic">Streptomyces</Emphasis> had on average 12.7 % larger niche widths (<Emphasis Type="Italic">t</Emphasis>-test, <Emphasis Type="Italic">t</Emphasis> = 2.77, <Emphasis Type="Italic">p</Emphasis> = 0.007) and 6.8 % more efficient growth (<Emphasis Type="Italic">t</Emphasis>-test, <Emphasis Type="Italic">t</Emphasis> = 2.01, <Emphasis Type="Italic">p</Emphasis> = 0.05) than super-killers. Thus, super-killers with broad inhibitory capacities had more restricted niches and grew less efficiently than non-inhibitory <Emphasis Type="Italic">Streptomyces</Emphasis>. This suggests that there may be significant tradeoffs between cumulative inhibition capacity and both niche width and growth efficiency among <Emphasis Type="Italic">Streptomyces.</Emphasis> Niche width reductions in super-killers may result from evolutionary tradeoffs between genomic investments in primary versus secondary metabolism, specifically reductions in the diversity of metabolic capacities retained by highly inhibitory populations. In contrast, reduced growth efficiencies among super-killers may be an ecological consequence of energetic costs associated with antibiotic production that limit population growth rates, rather than the diversity of metabolic pathways.<Figure ID="Fig3" Float="Yes" Category="Standard"><Caption Language="En"><CaptionNumber>Fig. 3</CaptionNumber><CaptionContent><SimplePara>Relationships between cumulative inhibition (<Emphasis Type="Italic">left panels</Emphasis>) and resistance (<Emphasis Type="Italic">right panels</Emphasis>) phenotypes with niche width (<Emphasis Type="Italic">top panels</Emphasis>) and growth efficiency (<Emphasis Type="Italic">bottom panels</Emphasis>) among <Emphasis Type="Italic">Streptomyces</Emphasis> isolates. Spearman’s correlation coefficients and p-values are presented for relationships in each panel. Bars represent mean growth efficiency or niche width in each category</SimplePara></CaptionContent></Caption><MediaObject ID="MO3"><ImageObject FileRef="12862_2015_470_Fig3_HTML.gif" Format="GIF" Color="BlackWhite" Type="LinedrawHalftone" Rendition="HTML"/></MediaObject></Figure><Figure ID="Fig4" Float="Yes" Category="Standard"><Caption Language="En"><CaptionNumber>Fig. 4</CaptionNumber><CaptionContent><SimplePara>Niche width (±SEM; <Emphasis Type="Italic">top panels</Emphasis>) and growth efficiency (±SEM; <Emphasis Type="Italic">bottom panels</Emphasis>) among <Emphasis Type="Italic">Streptomyces</Emphasis> exhibiting distinct inhibition strategies (non-inhibitory vs super-killers; <Emphasis Type="Italic">left panels</Emphasis>) and resistance strategies (low resistance vs high resistance; <Emphasis Type="Italic">right panels</Emphasis>). P-values represent Student’s t-tests between groups in each panel</SimplePara></CaptionContent></Caption><MediaObject ID="MO4"><ImageObject FileRef="12862_2015_470_Fig4_HTML.gif" Format="GIF" Color="BlackWhite" Type="LinedrawHalftone" Rendition="HTML"/></MediaObject></Figure></Para><Para ID="Par19"><Emphasis Type="Italic">Streptomyces</Emphasis> with distinct inhibitory capacities (super-killers versus non-inhibitors) differed in their likelihood of using specific carbon sources for growth. Of the 95 sole carbon sources present on the Biolog SF-P2 plate, 21 carbon compounds were used significantly more or less frequently by super-killers than non-inhibitory <Emphasis Type="Italic">Streptomyces</Emphasis> (Fig. <InternalRef RefID="Fig5">5a</InternalRef>). These differentially used carbon sources included carbohydrates (<Emphasis Type="Italic">n</Emphasis> = 13), carboxylic acids (<Emphasis Type="Italic">n</Emphasis> = 3), amino acids (<Emphasis Type="Italic">n</Emphasis> = 2), polymers (<Emphasis Type="Italic">n</Emphasis> = 1), and miscellaneous compounds (<Emphasis Type="Italic">n</Emphasis> = 2). In general, super-killers used carbon sources less frequently than non-inhibitory <Emphasis Type="Italic">Streptomyces</Emphasis> (<Emphasis Type="Italic">n</Emphasis> = 19 of 21 differentially used sole carbon sources), consistent with a niche width-inhibition capacity tradeoff. However, D-alanine and α-ketoglutaric acid were used at significantly higher frequencies among super-killers than among non-inhibitory strains (71 % vs. 45 % and 92 % vs. 66 %, respectively).<Figure ID="Fig5" Float="Yes" Category="Standard"><Caption Language="En"><CaptionNumber>Fig. 5</CaptionNumber><CaptionContent><SimplePara>Sole carbon sources present on the Biolog SF-P2 plate that were used significantly more or less frequently among non-inhibitory versus super-killer <Emphasis Type="Italic">Streptomyces</Emphasis> (<Emphasis Type="Bold">a</Emphasis>) or those with low versus high resistance capacity (<Emphasis Type="Bold">b</Emphasis>). Significant differences in frequencies of carbon source use were determined with Pearson’s Chi-squared tests and, p-values &lt;0.05 after FDR correction were considered significant</SimplePara></CaptionContent></Caption><MediaObject ID="MO5"><ImageObject FileRef="12862_2015_470_Fig5_HTML.gif" Format="GIF" Color="BlackWhite" Type="LinedrawHalftone" Rendition="HTML"/></MediaObject></Figure></Para></Section2><Section2 ID="Sec10"><Heading>Resistance-resource use tradeoffs</Heading><Para ID="Par20"><Emphasis Type="Italic">Streptomyces</Emphasis> that could resist inhibition by particular standards were sometimes less growth efficient or had smaller niche widths than isolates that were susceptible to that <Emphasis Type="Italic">Streptomyces</Emphasis> (Table <InternalRef RefID="Tab2">2</InternalRef>). Isolates able to resist standards LK2-12, LK4-16, LK4-24, LK6-14, DL87, and DL93 were significantly less growth efficient than isolates that were susceptible to these standards. Similarly, <Emphasis Type="Italic">Streptomyces</Emphasis> that were able to resist standards LK4-16 and DL93 also had smaller niche widths than susceptible <Emphasis Type="Italic">Streptomyces.</Emphasis> In general, <Emphasis Type="Italic">Streptomyces</Emphasis> resistant to individual standards were consistently less growth efficient (9 of 10 standards) or had smaller niche widths (7 of 10 standards) than <Emphasis Type="Italic">Streptomyces</Emphasis> susceptible to that standard.<Table ID="Tab2" Float="Yes"><Caption Language="En"><CaptionNumber>Table 2</CaptionNumber><CaptionContent><SimplePara>Differences in growth efficiency and niche widths among <Emphasis Type="Italic">Streptomyces</Emphasis> susceptible and resistant to individual standards</SimplePara></CaptionContent></Caption><tgroup cols="11" align="left"><colspec colnum="1" colname="c1" align="left"/><colspec colnum="2" colname="c2" align="left"/><colspec colnum="3" colname="c3" align="left"/><colspec colnum="4" colname="c4" align="left"/><colspec colnum="5" colname="c5" align="left"/><colspec colnum="6" colname="c6" align="left"/><colspec colnum="7" colname="c7" align="left"/><colspec colnum="8" colname="c8" align="left"/><colspec colnum="9" colname="c9" align="left"/><colspec colnum="10" colname="c10" align="left"/><colspec colnum="11" colname="c11" align="left"/><tbody><thead><row><entry colname="c1"/><entry namest="c2" nameend="c6"><SimplePara>Growth Efficiency (± SD)</SimplePara></entry><entry namest="c7" nameend="c11"><SimplePara>Niche Width (± SD)</SimplePara></entry><entry colname="c11"/></row><row><entry colname="c1"><SimplePara>Standard</SimplePara></entry><entry colname="c2"><SimplePara>Resistant</SimplePara></entry><entry colname="c3"><SimplePara>Susceptible</SimplePara></entry><entry colname="c4"><SimplePara>df</SimplePara></entry><entry colname="c5"><SimplePara>t-val</SimplePara></entry><entry colname="c6"><SimplePara>p-val</SimplePara></entry><entry colname="c7"><SimplePara>Resistant</SimplePara></entry><entry colname="c8"><SimplePara>Susceptible</SimplePara></entry><entry colname="c9"><SimplePara>df</SimplePara></entry><entry colname="c10"><SimplePara>t-val</SimplePara></entry><entry colname="c11"><SimplePara>p-val</SimplePara></entry></row></thead><row><entry colname="c1"><SimplePara>LK2-12</SimplePara></entry><entry colname="c2"><SimplePara>0.062 ± 0.013</SimplePara></entry><entry colname="c3"><SimplePara>0.068 ± 0.016</SimplePara></entry><entry colname="c4"><SimplePara>94.3</SimplePara></entry><entry colname="c5"><SimplePara>−2.40</SimplePara></entry><entry colname="c6"><SimplePara>0.018</SimplePara></entry><entry colname="c7"><SimplePara>72.6 ± 13.0</SimplePara></entry><entry colname="c8"><SimplePara>73.3 ± 17.2</SimplePara></entry><entry colname="c9"><SimplePara>104.1</SimplePara></entry><entry colname="c10"><SimplePara>−0.33</SimplePara></entry><entry colname="c11"><SimplePara>0.742</SimplePara></entry></row><row><entry colname="c1"><SimplePara>LK4-2</SimplePara></entry><entry colname="c2"><SimplePara>0.066 ± 0.015</SimplePara></entry><entry colname="c3"><SimplePara>0.068 ± 0.014</SimplePara></entry><entry colname="c4"><SimplePara>20.1</SimplePara></entry><entry colname="c5"><SimplePara>−0.39</SimplePara></entry><entry colname="c6"><SimplePara>0.701</SimplePara></entry><entry colname="c7"><SimplePara>72.8 ± 16.6</SimplePara></entry><entry colname="c8"><SimplePara>74.1 ± 15.5</SimplePara></entry><entry colname="c9"><SimplePara>20.1</SimplePara></entry><entry colname="c10"><SimplePara>−0.34</SimplePara></entry><entry colname="c11"><SimplePara>0.740</SimplePara></entry></row><row><entry colname="c1"><SimplePara>LK4-16</SimplePara></entry><entry colname="c2"><SimplePara>0.064 ± 0.014</SimplePara></entry><entry colname="c3"><SimplePara>0.079 ± 0.017</SimplePara></entry><entry colname="c4"><SimplePara>56.8</SimplePara></entry><entry colname="c5"><SimplePara>−5.85</SimplePara></entry><entry colname="c6"><SimplePara>&lt;0.001</SimplePara></entry><entry colname="c7"><SimplePara>71.1 ± 16.8</SimplePara></entry><entry colname="c8"><SimplePara>81.9 ± 10.7</SimplePara></entry><entry colname="c9"><SimplePara>96.1</SimplePara></entry><entry colname="c10"><SimplePara>−5.47</SimplePara></entry><entry colname="c11"><SimplePara>&lt;0.001</SimplePara></entry></row><row><entry colname="c1"><SimplePara>LK4-20</SimplePara></entry><entry colname="c2"><SimplePara>0.067 ± 0.015</SimplePara></entry><entry colname="c3"><SimplePara>0.059 ± 0.010</SimplePara></entry><entry colname="c4"><SimplePara>4.4</SimplePara></entry><entry colname="c5"><SimplePara>1.68</SimplePara></entry><entry colname="c6"><SimplePara>0.161</SimplePara></entry><entry colname="c7"><SimplePara>73.2 ± 16.5</SimplePara></entry><entry colname="c8"><SimplePara>72.0 ± 12.8</SimplePara></entry><entry colname="c9"><SimplePara>4.3</SimplePara></entry><entry colname="c10"><SimplePara>0.21</SimplePara></entry><entry colname="c11"><SimplePara>0.845</SimplePara></entry></row><row><entry colname="c1"><SimplePara>LK4-21</SimplePara></entry><entry colname="c2"><SimplePara>0.063 ± 0.013</SimplePara></entry><entry colname="c3"><SimplePara>0.067 ± 0.016</SimplePara></entry><entry colname="c4"><SimplePara>62.1</SimplePara></entry><entry colname="c5"><SimplePara>−1.66</SimplePara></entry><entry colname="c6"><SimplePara>0.103</SimplePara></entry><entry colname="c7"><SimplePara>73.3 ± 11.9</SimplePara></entry><entry colname="c8"><SimplePara>73.2 ± 17.2</SimplePara></entry><entry colname="c9"><SimplePara>75.3</SimplePara></entry><entry colname="c10"><SimplePara>0.04</SimplePara></entry><entry colname="c11"><SimplePara>0.965</SimplePara></entry></row><row><entry colname="c1"><SimplePara>LK4-24</SimplePara></entry><entry colname="c2"><SimplePara>0.063 ± 0.013</SimplePara></entry><entry colname="c3"><SimplePara>0.068 ± 0.016</SimplePara></entry><entry colname="c4"><SimplePara>130.5</SimplePara></entry><entry colname="c5"><SimplePara>−2.57</SimplePara></entry><entry colname="c6"><SimplePara>0.011</SimplePara></entry><entry colname="c7"><SimplePara>72.7 ± 12.7</SimplePara></entry><entry colname="c8"><SimplePara>73.3 ± 17.5</SimplePara></entry><entry colname="c9"><SimplePara>148.2</SimplePara></entry><entry colname="c10"><SimplePara>−0.32</SimplePara></entry><entry colname="c11"><SimplePara>0.748</SimplePara></entry></row><row><entry colname="c1"><SimplePara>LK6-14</SimplePara></entry><entry colname="c2"><SimplePara>0.066 ± 0.015</SimplePara></entry><entry colname="c3"><SimplePara>0.078 ± 0.006</SimplePara></entry><entry colname="c4"><SimplePara>3.6</SimplePara></entry><entry colname="c5"><SimplePara>−3.44</SimplePara></entry><entry colname="c6"><SimplePara>0.031</SimplePara></entry><entry colname="c7"><SimplePara>73.1 ± 16.5</SimplePara></entry><entry colname="c8"><SimplePara>76.8 ± 13.2</SimplePara></entry><entry colname="c9"><SimplePara>3.1</SimplePara></entry><entry colname="c10"><SimplePara>−0.54</SimplePara></entry><entry colname="c11"><SimplePara>0.625</SimplePara></entry></row><row><entry colname="c1"><SimplePara>LK10-3</SimplePara></entry><entry colname="c2"><SimplePara>0.066 ± 0.015</SimplePara></entry><entry colname="c3"><SimplePara>0.073 ± 0.009</SimplePara></entry><entry colname="c4"><SimplePara>3.3</SimplePara></entry><entry colname="c5"><SimplePara>−1.49</SimplePara></entry><entry colname="c6"><SimplePara>0.226</SimplePara></entry><entry colname="c7"><SimplePara>73.3 ± 16.5</SimplePara></entry><entry colname="c8"><SimplePara>75.5 ± 6.6</SimplePara></entry><entry colname="c9"><SimplePara>3.6</SimplePara></entry><entry colname="c10"><SimplePara>−0.65</SimplePara></entry><entry colname="c11"><SimplePara>0.555</SimplePara></entry></row><row><entry colname="c1"><SimplePara>DL87</SimplePara></entry><entry colname="c2"><SimplePara>0.066 ± 0.015</SimplePara></entry><entry colname="c3"><SimplePara>0.082 ± 0.003</SimplePara></entry><entry colname="c4"><SimplePara>1.5</SimplePara></entry><entry colname="c5"><SimplePara>−6.86</SimplePara></entry><entry colname="c6"><SimplePara>0.043</SimplePara></entry><entry colname="c7"><SimplePara>73.2 ± 16.4</SimplePara></entry><entry colname="c8"><SimplePara>67.5 ± 13.4</SimplePara></entry><entry colname="c9"><SimplePara>1.0</SimplePara></entry><entry colname="c10"><SimplePara>0.60</SimplePara></entry><entry colname="c11"><SimplePara>0.654</SimplePara></entry></row><row><entry colname="c1"><SimplePara>DL93</SimplePara></entry><entry colname="c2"><SimplePara>0.063 ± 0.013</SimplePara></entry><entry colname="c3"><SimplePara>0.081 ± 0.017</SimplePara></entry><entry colname="c4"><SimplePara>66.5</SimplePara></entry><entry colname="c5"><SimplePara>−7.03</SimplePara></entry><entry colname="c6"><SimplePara>&lt;0.001</SimplePara></entry><entry colname="c7"><SimplePara>71.6 ± 16.3</SimplePara></entry><entry colname="c8"><SimplePara>80.9 ± 12.4</SimplePara></entry><entry colname="c9"><SimplePara>100.2</SimplePara></entry><entry colname="c10"><SimplePara>−4.51</SimplePara></entry><entry colname="c11"><SimplePara>&lt;0.001</SimplePara></entry></row></tbody></tgroup><tfooter><SimplePara>Growth efficiency (±standard deviation) and niche width (±standard deviation) of <Emphasis Type="Italic">Streptomyces</Emphasis> resistant and susceptible to inhibition by individual standard isolates. Degrees of freedom, t-values, and p-values of t-tests between resistant and susceptible <Emphasis Type="Italic">Streptomyces</Emphasis> are presented</SimplePara></tfooter></Table></Para><Para ID="Par21">In contrast to relationships for inhibition intensity, resistance zones (inhibition zone size of standards <Emphasis Type="Italic">Streptomyces</Emphasis> against environmental isolates) had no clear relationship with growth efficiency or niche width. This suggests that the costs of resistance may be largely associated with the presence of a resistant phenotype, rather than the degree of resistance conferred. However, the number of susceptible <Emphasis Type="Italic">Streptomyces</Emphasis> varied considerably for individual standards (<Emphasis Type="Italic">n</Emphasis> = 2 to <Emphasis Type="Italic">n</Emphasis> = 213; Additional file <InternalRef RefID="MOESM1">1</InternalRef>), which may limit our ability to detect significant relationships in cases where there are very few susceptible isolates.</Para><Para ID="Par22">The number of standards that <Emphasis Type="Italic">Streptomyces</Emphasis> isolates could resist was negatively correlated with niche width (Fig. <InternalRef RefID="Fig3">3</InternalRef>; Spearman’s <Emphasis Type="Italic">ρ</Emphasis> = −0.26, <Emphasis Type="Italic">p</Emphasis> &lt; 0.0001, <Emphasis Type="Italic">z</Emphasis> = −4.15) and growth efficiency (Fig. <InternalRef RefID="Fig3">3</InternalRef>; Spearman’s <Emphasis Type="Italic">ρ</Emphasis> = −0.35, <Emphasis Type="Italic">p</Emphasis> &lt; 0.0001, <Emphasis Type="Italic">z</Emphasis> = −5.72). <Emphasis Type="Italic">Streptomyces</Emphasis> with greater resistance capacity tended to have smaller niche widths and grow less efficiently than more susceptible isolates. <Emphasis Type="Italic">Streptomyces</Emphasis> with very high versus low antibiotic resistance capacities also differed significantly in resource use. Isolates with little resistance to inhibition by standards (those that could resist inhibition by ≤5 standards) had significantly larger niche widths and higher growth efficiency than highly resistant <Emphasis Type="Italic">Streptomyces</Emphasis> (those that resisted inhibition by ≥8 standards; Fig. <InternalRef RefID="Fig4">4</InternalRef>). On average, <Emphasis Type="Italic">Streptomyces</Emphasis> with little resistance had 12.4 % larger niche widths (<Emphasis Type="Italic">t</Emphasis>-test, <Emphasis Type="Italic">t</Emphasis> = 4.12, <Emphasis Type="Italic">p</Emphasis> &lt; 0.0001), and 28.0 % greater growth efficiency (<Emphasis Type="Italic">t</Emphasis>-test, <Emphasis Type="Italic">t</Emphasis> = 6.53, <Emphasis Type="Italic">p</Emphasis> &lt; 0.0001) than <Emphasis Type="Italic">Streptomyces</Emphasis> with a high number of resistances, suggesting substantial growth efficiency-resistance and niche width-resistance tradeoffs among <Emphasis Type="Italic">Streptomyces</Emphasis> isolates. Tradeoffs between niche width and resistance capacity may reflect distinct genomic investment in primary metabolism versus antibiotic resistance strategies, where highly resistant isolates are less capable of metabolizing diverse carbon sources. In contrast, growth efficiency-resistance tradeoffs may be a consequence of the direct physiological costs of bearing multiple resistance traits that limit population growth rates.</Para><Para ID="Par23"><Emphasis Type="Italic">Streptomyces</Emphasis> with low versus high capacities to resist inhibition by standards differed significantly in the frequency with which they used specific carbon compounds for growth. Of the 95 sole carbon sources present on Biolog SF-P2 plates, nineteen carbon sources were used at different frequencies between <Emphasis Type="Italic">Streptomyces</Emphasis> with low versus high resistance capacities (Fig. <InternalRef RefID="Fig5">5b</InternalRef>). Differentially used carbon compounds included carbohydrates (<Emphasis Type="Italic">n</Emphasis> = 13), polymers (<Emphasis Type="Italic">n</Emphasis> = 3), amino acids (<Emphasis Type="Italic">n</Emphasis> = 1), and miscellaneous compounds (<Emphasis Type="Italic">n</Emphasis> = 2). Similar to patterns observed for super-killers versus non-inhibitors, <Emphasis Type="Italic">Streptomyces</Emphasis> with low resistance capacities utilized most carbon compounds at significantly higher frequencies than those with high resistance capacities (<Emphasis Type="Italic">n</Emphasis> = 18 of the 19 differentially used sole carbon sources). Intriguingly, D-alanine was an exception and was used for growth by a greater proportion of highly resistant strains (82 % of strains) than those with low resistance capacities (40 % of strains). Together, these data indicate that reductions in niche width among <Emphasis Type="Italic">Streptomyces</Emphasis> with high versus low resistance capacities are often specific to individual carbon compounds.</Para></Section2></Section1><Section1 ID="Sec11"><Heading>Discussion</Heading><Para ID="Par24">Most <Emphasis Type="Italic">Streptomyces</Emphasis> were characterized by one of two distinct inhibitory strategies, tending to be either non-inhibitory, or highly inhibitory “super-killers”. Because antibiotic inhibitory interactions can be highly specific among <Emphasis Type="Italic">Streptomyces</Emphasis> isolates [<CitationRef CitationID="CR4">4</CitationRef>, <CitationRef CitationID="CR29">29</CitationRef>], the benefits of producing a particular antibiotic may vary across communities. Specifically, since genes encoding resistance to antibiotics are broadly distributed in natural soil habitats [<CitationRef CitationID="CR7">7</CitationRef>, <CitationRef CitationID="CR16">16</CitationRef>, <CitationRef CitationID="CR30">30</CitationRef>], competitors may acquire resistance to a specific antibiotic and offset the benefits of antibiotic production to the producing organism [<CitationRef CitationID="CR6">6</CitationRef>, <CitationRef CitationID="CR13">13</CitationRef>]. However, combinations of antibiotics, especially those with different modes of action, can substantially reduce the likelihood that any one competitor bears resistance to every antibiotic and may slow the evolution of novel resistances [<CitationRef CitationID="CR31">31</CitationRef>]. Indeed, selection for <Emphasis Type="Italic">Streptomyces</Emphasis> to produce antibiotic compounds that act synergistically is thought to play a significant role in the evolution of <Emphasis Type="Italic">Streptomyces</Emphasis> secondary metabolism [<CitationRef CitationID="CR15">15</CitationRef>]. Thus, accumulating multiple synergistic or complementary pathways for antibiotic production within individual <Emphasis Type="Italic">Streptomyces</Emphasis> strains may confer substantial and potentially synergistic fitness benefits to producers across time and space. As a result, optimal strategies for an antagonistic lifestyle may tend towards relatively high accumulation of antibiotic inhibitory phenotypes (super-killers), as observed here.</Para><Para ID="Par25">Although antibiotic phenotypes are assumed to impose costs of production [<CitationRef CitationID="CR11">11</CitationRef>–<CitationRef CitationID="CR13">13</CitationRef>] our explicit goal was not to determine physiological costs of <Emphasis Type="Italic">in vitro</Emphasis> antibiotic production but rather to document life-history tradeoffs across a diverse collection of naturally-occurring <Emphasis Type="Italic">Streptomyces</Emphasis> isolates. Negative relationships between <Emphasis Type="Italic">Streptomyces</Emphasis> inhibitory phenotypes and niche width or growth efficiency and the substantially smaller growth efficiencies and niche widths for super-killer versus non-inhibitory <Emphasis Type="Italic">Streptomyces</Emphasis> suggest significant growth-inhibition and niche width-inhibition tradeoffs associated with these traits. These tradeoffs may represent physiological costs of constitutive antibiotic production, pleiotropic effects of genes involved in primary or secondary metabolism, or the costs of accumulating antibiotic biosynthetic pathways for multiple antibiotic compounds.</Para><Para ID="Par26">Negative relationships between inhibition intensity against standards and growth efficiency or niche width were common, yet significant differences in growth efficiency or niche width between inhibitors and non-inhibitors were observed for only a few standards. This suggests that the physiological costs of inhibition of a single target may be more strongly associated with inhibition intensity, while genomic costs were more evidenced in cumulative inhibitory capacities. Physiological tradeoffs associated with expressing a given biosynthetic pathway for antibiotic production may be offset by tightly-controlled regulation. This is frequently the case among <Emphasis Type="Italic">Streptomyces</Emphasis>, where genes encoding the production of many secondary metabolites have diverse and highly complex regulatory mechanisms which often require very specific growth conditions, nutrient limitation, and/or extra-cellular signals for expression [<CitationRef CitationID="CR32">32</CitationRef>–<CitationRef CitationID="CR35">35</CitationRef>]. In general, the biosynthesis of many antibiotic compounds produced by <Emphasis Type="Italic">Streptomyces</Emphasis> occurs when nitrogen, phosphorus, or carbon sources become limiting and the process of morphological differentiation is triggered [<CitationRef CitationID="CR23">23</CitationRef>, <CitationRef CitationID="CR32">32</CitationRef>]. Moreover, some specific carbon compounds, such as N-acetyl-glucosamine, can have differential effects on this process depending on resource availability [<CitationRef CitationID="CR22">22</CitationRef>]. Because of the complex and tightly-controlled nature of antibiotic biosynthesis, the tradeoffs observed in this work between inhibition intensity and growth efficiency or niche width may be capturing only a small subset of the potential antibiotic compounds produced by <Emphasis Type="Italic">Streptomyces</Emphasis> isolates. We observed growth efficiency and niche width tradeoffs associated with individual resistance phenotypes only for a small number of standards, suggesting that the cost of any specific resistance phenotype may be very small. This may be due in part to compensatory mutations, which are likely to minimize tradeoffs by rapidly alleviating the costs of antibiotic resistance [<CitationRef CitationID="CR36">36</CitationRef>, <CitationRef CitationID="CR37">37</CitationRef>] or a low cost of resistance mechanisms that require induction by antibiotic compounds [<CitationRef CitationID="CR38">38</CitationRef>]. However, the significant negative correlation between accumulated resistance capacities with growth efficiency and niche width, as well as the substantial difference in growth efficiency and niche width among highly resistant versus susceptible isolates, suggests that costs of resistance can be substantial as multiple resistances accumulate. Although some resistance mechanisms may provide resistance to a broad range of antibiotic compounds with little or no additive cost (eg. multi-drug efflux pumps), epistatic interactions between distinct resistance mechanisms or resistance mutations are also suggested to be crucial to the fitness costs of antibiotic resistance [<CitationRef CitationID="CR39">39</CitationRef>, <CitationRef CitationID="CR40">40</CitationRef>]. Thus, the greater-than-additive costs of multiple resistances are likely to be important constraints to the accumulation of antibiotic resistances within <Emphasis Type="Italic">Streptomyces</Emphasis> populations in soil.</Para><Para ID="Par27">In contrast to antibiotic inhibition, cumulative capacities to resist antibiotic inhibition (the number of standards that an isolate could resist) were approximately normally distributed among <Emphasis Type="Italic">Streptomyces</Emphasis>, and resistance to inhibition by an intermediate number of standards was the most common phenotype among isolates. In natural settings <Emphasis Type="Italic">Streptomyces</Emphasis> are commonly resistant to many antibiotics, even in environments with no history of antibiotic contamination from anthropogenic sources [<CitationRef CitationID="CR16">16</CitationRef>, <CitationRef CitationID="CR30">30</CitationRef>]. This suggests that species interactions in natural populations contribute to the maintenance of multiple resistance phenotypes. In particular, strong selection for resistance is expected to result from the severe fitness consequences of being susceptible to inhibition by antibiotics produced by competitors. However, reductions in growth efficiency and niche width as antibiotic resistances accumulate may constrain the acquisition of greater resistance capacities in <Emphasis Type="Italic">Streptomyces</Emphasis> isolates. These constraints combined with the substantial fitness cost of lacking resistance to antibiotic-producers may generate stabilizing selection that favors <Emphasis Type="Italic">Streptomyces</Emphasis> with moderate resistance capacities rather than those having very few or very many antibiotic resistances.</Para><Para ID="Par28">Highly inhibitory super-killer and highly resistant <Emphasis Type="Italic">Streptomyces</Emphasis> used many carbon sources at significantly lower frequencies than non-inhibitory or poorly resistant <Emphasis Type="Italic">Streptomyces</Emphasis>. This suggests that reductions in niche widths associated with these lifestyles are resource-specific (Fig. <InternalRef RefID="Fig5">5</InternalRef>), and that physiological or genomic costs of these life-styles are reflected in more restricted primary metabolic capabilities to utilize specific compounds for growth. In some cases (eg. for D-alanine, an essential component of the peptidoglycan layer of the bacterial cell wall), these compounds may be have a specific physiological role in antibiotic resistance phenotypes [<CitationRef CitationID="CR41">41</CitationRef>].</Para><Para ID="Par29">Although we found compelling evidence for resource use tradeoffs with antibiotic inhibition and cumulative resistance capacity, there was substantial variability in niche width and growth efficiency among <Emphasis Type="Italic">Streptomyces</Emphasis> with different antibiotic inhibition and resistance phenotypes. This may in part be due to the assumption that <Emphasis Type="Italic">Streptomyces</Emphasis> isolates able to inhibit or resist many other strains produce more antibiotic compounds or have a greater number of antibiotic resistance factors. However, the potential that for some <Emphasis Type="Italic">Streptomyces</Emphasis> a single antibiotic can inhibit multiple standards is likely to confound the relationship between cumulative inhibition capacity and niche width or growth efficiency among isolates. Furthermore, due to the complex regulation of antibiotic production, the phenotypic assays in this work likely captured only a subset of the inhibitory potential of our isolates. Similarly, the effectiveness of distinct resistance mechanisms for providing protection against multiple standards in this work is not known. Diverse mechanisms of antibiotic resistance (eg. efflux pumps, mutation, influx decrease, antibiotic modification) may confer resistance to multiple antibiotics, or may also impose different fitness costs [<CitationRef CitationID="CR37">37</CitationRef>, <CitationRef CitationID="CR40">40</CitationRef>]. In light of these considerations, the substantial variation in niche width and growth efficiency among <Emphasis Type="Italic">Streptomyces</Emphasis> with similar inhibition or resistance capacities is not surprising. Further studies using population genomics tools to quantify the specific secondary metabolic pathways, resistance factors, and primary metabolic capacities of these populations will address these issues and offer critical insight into genomic and physiological tradeoffs among <Emphasis Type="Italic">Streptomyces</Emphasis>.</Para><Para ID="Par30">Intriguingly, reductions in growth efficiency and niche width were substantially smaller for <Emphasis Type="Italic">Streptomyces</Emphasis> with super-killer versus non-inhibitory life-history strategies than for those with highly resistant versus susceptible lifestyles. This suggests that it may be more costly to accumulate capacities to resist many antibiotics than to accumulate ability to inhibit (kill) many targets. This is a particularly novel finding considering that the fitness costs of antibiotic resistance in clinical settings are often found to be small [<CitationRef CitationID="CR42">42</CitationRef>] and that the pathways responsible for antibiotic biosynthesis require one or more large, multi-domain enzymes (polyketide synthases and non-ribosomal peptide synthases). Differences in costs of accumulating antibiotic resistance and antibiotic production pathways may contribute significantly to the dynamics of antibiotic inhibition and resistance in natural communities across the landscape.</Para></Section1><Section1 ID="Sec12"><Heading>Conclusions</Heading><Para ID="Par31">Our findings suggest that tradeoffs are likely to constrain the evolution of extreme antibiotic inhibitory and resistance phenotypes among natural populations of soil-borne <Emphasis Type="Italic">Streptomyces</Emphasis>. Moreover, greater apparent costs of accumulating multiple resistances versus inhibitory capacities are surprising, and appear to generate different distributions of these phenotypes among <Emphasis Type="Italic">Streptomyces</Emphasis> isolates. Further work exploring the roles tradeoffs play in the evolution of <Emphasis Type="Italic">Streptomyces</Emphasis> will be essential to elucidating the forces that generate and maintain the vast diversity of antibiotic inhibitory and resistance phenotypes in soil communities.</Para></Section1></Body><BodyRef FileRef="12862_2015_470_OnlinePDF.pdf" TargetType="OnlinePDF"/><ArticleBackmatter><ArticleNote Type="Misc"><Heading>Competing interests</Heading><SimplePara>We declare that there are no conflicts of interest associated with this work.</SimplePara></ArticleNote><ArticleNote Type="Misc"><Heading>Author’s contributions</Heading><SimplePara>LLK designed this study, DCS compiled and analyzed data, and DCS and LLK wrote this manuscript. Both authors read and approved the final manuscript.</SimplePara></ArticleNote><Acknowledgments><Heading>Acknowledgements</Heading><SimplePara>We gratefully acknowledge Anita Baines, Jen Flor, Dale Johnson, Erica Marti, and Kun Xiao for careful sampling, isolation, and phenotypic analysis of <Emphasis Type="Italic">Streptomyces</Emphasis> strains used in this work. We thank Brett Arenz, Eric Lind, Christine Salomon, and anonymous reviewers for critical and helpful feedback in preparing this manuscript. This project was supported by Agriculture and Food Research Initiative Competitive Grant Numbers 2011-67019-30200 and 2011-67019-30330 from the USDA National Institute of Food and Agriculture. Research funding was also provided by the USDA CSREES Microbial Observatories program (Grant 2006-04464), the NSF Microbial Observatories Program (Grant 9977907), the NSF Long-Term Ecological Research Program (DEB-0080382), and the Minnesota Agricultural Experiment Station.</SimplePara></Acknowledgments><Appendix ID="App1" OutputMedium="Online"><Section1 ID="Sec13"><Heading>Additional file</Heading><Para ID="Par32"><MediaObject ID="MOESM1"><DataObject FileRef="12862_2015_470_MOESM1_ESM.pdf"><Caption Language="En"><CaptionNumber>Additional file 1:</CaptionNumber><CaptionContent><SimplePara><Emphasis Type="Bold">Linear regression analysis of inhibition or resistance zone sizes with growth efficiency or niche width for only those</Emphasis> <Emphasis Type="BoldItalic">Streptomyces</Emphasis> <Emphasis Type="Bold">able to inhibit or resist a given standard test isolate.</Emphasis> (PDF 270 kb)</SimplePara></CaptionContent></Caption></DataObject></MediaObject></Para></Section1></Appendix><Bibliography ID="Bib1"><Heading>References</Heading><Citation ID="CR1"><CitationNumber>1.</CitationNumber><BibArticle><BibAuthorName><Initials>MG</Initials><FamilyName>Watve</FamilyName></BibAuthorName><BibAuthorName><Initials>R</Initials><FamilyName>Tickoo</FamilyName></BibAuthorName><BibAuthorName><Initials>MM</Initials><FamilyName>Jog</FamilyName></BibAuthorName><BibAuthorName><Initials>BD</Initials><FamilyName>Bhole</FamilyName></BibAuthorName><Year>2001</Year><ArticleTitle Language="En">How many antibiotics are produced by the genus Streptomyces?</ArticleTitle><JournalTitle>Arch Microbiol</JournalTitle><VolumeID>176</VolumeID><FirstPage>386</FirstPage><LastPage>390</LastPage></BibArticle><BibUnstructured>Watve MG, Tickoo R, Jog MM, Bhole BD. How many antibiotics are produced by the genus Streptomyces? Arch Microbiol. 2001;176:386–90.</BibUnstructured></Citation><Citation ID="CR2"><CitationNumber>2.</CitationNumber><BibArticle><BibAuthorName><Initials>S</Initials><FamilyName>Williams</FamilyName></BibAuthorName><BibAuthorName><Initials>J</Initials><FamilyName>Vickers</FamilyName></BibAuthorName><Year>1986</Year><ArticleTitle Language="En">The ecology of antibiotic production</ArticleTitle><JournalTitle>Microb Ecol</JournalTitle><VolumeID>12</VolumeID><FirstPage>43</FirstPage><LastPage>52</LastPage></BibArticle><BibUnstructured>Williams S, Vickers J. The ecology of antibiotic production. Microb Ecol. 1986;12:43–52.</BibUnstructured></Citation><Citation ID="CR3"><CitationNumber>3.</CitationNumber><BibArticle><BibAuthorName><Initials>RD</Initials><FamilyName>Firn</FamilyName></BibAuthorName><BibAuthorName><Initials>CG</Initials><FamilyName>Jones</FamilyName></BibAuthorName><Year>2000</Year><ArticleTitle Language="En">The evolution of secondary metabolism - a unifying model</ArticleTitle><JournalTitle>Mol Microbiol</JournalTitle><VolumeID>37</VolumeID><FirstPage>989</FirstPage><LastPage>994</LastPage></BibArticle><BibUnstructured>Firn RD, Jones CG. The evolution of secondary metabolism - a unifying model. Mol Microbiol. 2000;37:989–94.</BibUnstructured></Citation><Citation ID="CR4"><CitationNumber>4.</CitationNumber><BibArticle><BibAuthorName><Initials>AL</Initials><FamilyName>Davelos</FamilyName></BibAuthorName><BibAuthorName><Initials>LL</Initials><FamilyName>Kinkel</FamilyName></BibAuthorName><BibAuthorName><Initials>DA</Initials><FamilyName>Samac</FamilyName></BibAuthorName><Year>2004</Year><ArticleTitle Language="En">Spatial variation in frequency and intensity of antibiotic interactions among streptomycetes from prairie soil</ArticleTitle><JournalTitle>Appl Environ Microbiol</JournalTitle><VolumeID>70</VolumeID><FirstPage>1051</FirstPage><LastPage>1058</LastPage></BibArticle><BibUnstructured>Davelos AL, Kinkel LL, Samac DA. Spatial variation in frequency and intensity of antibiotic interactions among streptomycetes from prairie soil. Appl Environ Microbiol. 2004;70:1051–8.</BibUnstructured></Citation><Citation ID="CR5"><CitationNumber>5.</CitationNumber><BibArticle><BibAuthorName><Initials>LL</Initials><FamilyName>Kinkel</FamilyName></BibAuthorName><BibAuthorName><Initials>DC</Initials><FamilyName>Schlatter</FamilyName></BibAuthorName><BibAuthorName><Initials>K</Initials><FamilyName>Xiao</FamilyName></BibAuthorName><BibAuthorName><Initials>AD</Initials><FamilyName>Baines</FamilyName></BibAuthorName><Year>2014</Year><ArticleTitle Language="En">Sympatric inhibition and niche differentiation suggest alternative coevolutionary trajectories among Streptomycetes</ArticleTitle><JournalTitle>ISME J</JournalTitle><VolumeID>8</VolumeID><FirstPage>249</FirstPage><LastPage>256</LastPage></BibArticle><BibUnstructured>Kinkel LL, Schlatter DC, Xiao K, Baines AD. Sympatric inhibition and niche differentiation suggest alternative coevolutionary trajectories among Streptomycetes. ISME J. 2014;8:249–56.</BibUnstructured></Citation><Citation ID="CR6"><CitationNumber>6.</CitationNumber><BibArticle><BibAuthorName><Initials>P</Initials><FamilyName>Weiner</FamilyName></BibAuthorName><BibAuthorName><Initials>S</Initials><FamilyName>Egan</FamilyName></BibAuthorName><BibAuthorName><Initials>EMH</Initials><FamilyName>Wellington</FamilyName></BibAuthorName><Year>1998</Year><ArticleTitle Language="En">Evidence for transfer of antibiotic resistance genes in soil populations of streptomycetes</ArticleTitle><JournalTitle>Mol Ecol</JournalTitle><VolumeID>7</VolumeID><FirstPage>1205</FirstPage><LastPage>1216</LastPage></BibArticle><BibUnstructured>Weiner P, Egan S, Wellington EMH. Evidence for transfer of antibiotic resistance genes in soil populations of streptomycetes. Mol Ecol. 1998;7:1205–16.</BibUnstructured></Citation><Citation ID="CR7"><CitationNumber>7.</CitationNumber><BibArticle><BibAuthorName><Initials>HK</Initials><FamilyName>Allen</FamilyName></BibAuthorName><BibAuthorName><Initials>J</Initials><FamilyName>Donato</FamilyName></BibAuthorName><BibAuthorName><Initials>HH</Initials><FamilyName>Wang</FamilyName></BibAuthorName><BibAuthorName><Initials>KA</Initials><FamilyName>Cloud-Hansen</FamilyName></BibAuthorName><BibAuthorName><Initials>J</Initials><FamilyName>Davies</FamilyName></BibAuthorName><BibAuthorName><Initials>J</Initials><FamilyName>Handelsman</FamilyName></BibAuthorName><Year>2010</Year><ArticleTitle Language="En">Call of the wild: antibiotic resistance genes in natural environments</ArticleTitle><JournalTitle>Nat Rev Microbiol</JournalTitle><VolumeID>8</VolumeID><FirstPage>251</FirstPage><LastPage>259</LastPage></BibArticle><BibUnstructured>Allen HK, Donato J, Wang HH, Cloud-Hansen KA, Davies J, Handelsman J. Call of the wild: antibiotic resistance genes in natural environments. Nat Rev Microbiol. 2010;8:251–9.</BibUnstructured></Citation><Citation ID="CR8"><CitationNumber>8.</CitationNumber><BibArticle><BibAuthorName><Initials>F</Initials><FamilyName>Walsh</FamilyName></BibAuthorName><BibAuthorName><Initials>B</Initials><FamilyName>Duffy</FamilyName></BibAuthorName><Year>2013</Year><ArticleTitle Language="En">The culturable soil antibiotic resistome: A community of multi-drug resistant bacteria</ArticleTitle><JournalTitle>PLoS One</JournalTitle><VolumeID>8</VolumeID><FirstPage>e65567</FirstPage></BibArticle><BibUnstructured>Walsh F, Duffy B. The culturable soil antibiotic resistome: A community of multi-drug resistant bacteria. PLoS One. 2013;8:e65567.</BibUnstructured></Citation><Citation ID="CR9"><CitationNumber>9.</CitationNumber><BibArticle><BibAuthorName><Initials>JM</Initials><FamilyName>Kneitel</FamilyName></BibAuthorName><BibAuthorName><Initials>JM</Initials><FamilyName>Chase</FamilyName></BibAuthorName><Year>2004</Year><ArticleTitle Language="En">Trade-offs in community ecology: linking spatial scales and species coexistence</ArticleTitle><JournalTitle>Ecol Lett</JournalTitle><VolumeID>7</VolumeID><FirstPage>69</FirstPage><LastPage>80</LastPage></BibArticle><BibUnstructured>Kneitel JM, Chase JM. Trade-offs in community ecology: linking spatial scales and species coexistence. Ecol Lett. 2004;7:69–80.</BibUnstructured></Citation><Citation ID="CR10"><CitationNumber>10.</CitationNumber><BibArticle><BibAuthorName><Initials>D</Initials><FamilyName>Tilman</FamilyName></BibAuthorName><Year>2011</Year><ArticleTitle Language="En">Diversification, biotic interchange, and the universal trade-off hypothesis</ArticleTitle><JournalTitle>Am Nat</JournalTitle><VolumeID>178</VolumeID><FirstPage>355</FirstPage><LastPage>371</LastPage></BibArticle><BibUnstructured>Tilman D. Diversification, biotic interchange, and the universal trade-off hypothesis. Am Nat. 2011;178:355–71.</BibUnstructured></Citation><Citation ID="CR11"><CitationNumber>11.</CitationNumber><BibArticle><BibAuthorName><Initials>TL</Initials><FamilyName>Czárán</FamilyName></BibAuthorName><Year>2002</Year><ArticleTitle Language="En">Chemical warfare between microbes promotes biodiversity</ArticleTitle><JournalTitle>Proc Natl Acad Sci U S A</JournalTitle><VolumeID>99</VolumeID><FirstPage>786</FirstPage><LastPage>790</LastPage></BibArticle><BibUnstructured>Czárán TL. Chemical warfare between microbes promotes biodiversity. Proc Natl Acad Sci U S A. 2002;99:786–90.</BibUnstructured></Citation><Citation ID="CR12"><CitationNumber>12.</CitationNumber><BibArticle><BibAuthorName><Initials>P</Initials><FamilyName>Garbeva</FamilyName></BibAuthorName><BibAuthorName><Initials>O</Initials><FamilyName>Tyc</FamilyName></BibAuthorName><BibAuthorName><Initials>MNP</Initials><FamilyName>Remus-Emsermann</FamilyName></BibAuthorName><BibAuthorName><Initials>A</Initials><FamilyName>Wal</FamilyName><Particle>van der</Particle></BibAuthorName><BibAuthorName><Initials>M</Initials><FamilyName>Vos</FamilyName></BibAuthorName><BibAuthorName><Initials>M</Initials><FamilyName>Silby</FamilyName></BibAuthorName><Etal/><Year>2011</Year><ArticleTitle Language="En">No apparent costs for facultative antibiotic production by the soil bacterium Pseudomonas fluorescens p f0–1</ArticleTitle><JournalTitle>PLoS ONE</JournalTitle><VolumeID>6</VolumeID><FirstPage>e27266</FirstPage></BibArticle><BibUnstructured>Garbeva P, Tyc O, Remus-Emsermann MNP, van der Wal A, Vos M, Silby M, et al. No apparent costs for facultative antibiotic production by the soil bacterium Pseudomonas fluorescens p f0–1. PLoS ONE. 2011;6:e27266.</BibUnstructured></Citation><Citation ID="CR13"><CitationNumber>13.</CitationNumber><BibArticle><BibAuthorName><Initials>LL</Initials><FamilyName>Kinkel</FamilyName></BibAuthorName><BibAuthorName><Initials>MG</Initials><FamilyName>Bakker</FamilyName></BibAuthorName><BibAuthorName><Initials>DC</Initials><FamilyName>Schlatter</FamilyName></BibAuthorName><Year>2011</Year><ArticleTitle Language="En">A coevolutionary framework for managing disease-suppressive soils</ArticleTitle><JournalTitle>Annu Rev Plant Physiol Plant Mol Biol</JournalTitle><VolumeID>49</VolumeID><FirstPage>47</FirstPage><LastPage>67</LastPage></BibArticle><BibUnstructured>Kinkel LL, Bakker MG, Schlatter DC. A coevolutionary framework for managing disease-suppressive soils. Annu Rev Plant Physiol Plant Mol Biol. 2011;49:47–67.</BibUnstructured></Citation><Citation ID="CR14"><CitationNumber>14.</CitationNumber><BibArticle><BibAuthorName><Initials>DI</Initials><FamilyName>Andersson</FamilyName></BibAuthorName><BibAuthorName><Initials>D</Initials><FamilyName>Hughes</FamilyName></BibAuthorName><Year>2010</Year><ArticleTitle Language="En">Antibiotic resistance and its cost: is it possible to reverse resistance?</ArticleTitle><JournalTitle>Nat Rev Microbiol</JournalTitle><VolumeID>8</VolumeID><FirstPage>260</FirstPage><LastPage>271</LastPage></BibArticle><BibUnstructured>Andersson DI, Hughes D. Antibiotic resistance and its cost: is it possible to reverse resistance? Nat Rev Microbiol. 2010;8:260–71.</BibUnstructured></Citation><Citation ID="CR15"><CitationNumber>15.</CitationNumber><BibArticle><BibAuthorName><Initials>GL</Initials><FamilyName>Challis</FamilyName></BibAuthorName><BibAuthorName><Initials>DA</Initials><FamilyName>Hopwood</FamilyName></BibAuthorName><Year>2003</Year><ArticleTitle Language="En">Synergy and contingency as driving forces for the evolution of multiple secondary metabolite production by Streptomyces species</ArticleTitle><JournalTitle>Proc Natl Acad Sci U S A</JournalTitle><VolumeID>100</VolumeID><IssueID>Suppl 2</IssueID><FirstPage>14555</FirstPage><LastPage>14561</LastPage></BibArticle><BibUnstructured>Challis GL, Hopwood DA. Synergy and contingency as driving forces for the evolution of multiple secondary metabolite production by Streptomyces species. Proc Natl Acad Sci U S A. 2003;100 Suppl 2:14555–61.</BibUnstructured></Citation><Citation ID="CR16"><CitationNumber>16.</CitationNumber><BibArticle><BibAuthorName><Initials>VM</Initials><FamilyName>D’Costa</FamilyName></BibAuthorName><BibAuthorName><Initials>KM</Initials><FamilyName>McGrann</FamilyName></BibAuthorName><BibAuthorName><Initials>DW</Initials><FamilyName>Hughes</FamilyName></BibAuthorName><BibAuthorName><Initials>GD</Initials><FamilyName>Wright</FamilyName></BibAuthorName><Year>2006</Year><ArticleTitle Language="En">Sampling the antibiotic resistome</ArticleTitle><JournalTitle>Science</JournalTitle><VolumeID>311</VolumeID><FirstPage>374</FirstPage><LastPage>377</LastPage></BibArticle><BibUnstructured>D’Costa VM, McGrann KM, Hughes DW, Wright GD. Sampling the antibiotic resistome. Science. 2006;311:374–7.</BibUnstructured></Citation><Citation ID="CR17"><CitationNumber>17.</CitationNumber><BibArticle><BibAuthorName><Initials>VM</Initials><FamilyName>D’Costa</FamilyName></BibAuthorName><BibAuthorName><Initials>E</Initials><FamilyName>Griffiths</FamilyName></BibAuthorName><BibAuthorName><Initials>GD</Initials><FamilyName>Wright</FamilyName></BibAuthorName><Year>2007</Year><ArticleTitle Language="En">Expanding the soil antibiotic resistome: exploring environmental diversity</ArticleTitle><JournalTitle>Curr Opin Microbiol</JournalTitle><VolumeID>10</VolumeID><FirstPage>481</FirstPage><LastPage>489</LastPage></BibArticle><BibUnstructured>D’Costa VM, Griffiths E, Wright GD. Expanding the soil antibiotic resistome: exploring environmental diversity. Curr Opin Microbiol. 2007;10:481–9.</BibUnstructured></Citation><Citation ID="CR18"><CitationNumber>18.</CitationNumber><BibBook><BibAuthorName><Initials>JN</Initials><FamilyName>Thompson</FamilyName></BibAuthorName><Year>2005</Year><BookTitle>The geographic mosaic of coevolution</BookTitle><PublisherName>University of Chicago Press</PublisherName><PublisherLocation>Chicago</PublisherLocation></BibBook><BibUnstructured>Thompson JN. The geographic mosaic of coevolution. Chicago: University of Chicago Press; 2005.</BibUnstructured></Citation><Citation ID="CR19"><CitationNumber>19.</CitationNumber><BibArticle><BibAuthorName><Initials>BJM</Initials><FamilyName>Bohannan</FamilyName></BibAuthorName><BibAuthorName><Initials>RE</Initials><FamilyName>Lenski</FamilyName></BibAuthorName><Year>2000</Year><ArticleTitle Language="En">Linking genetic change to community evolution: insights from studies of bacteria and bacteriophage</ArticleTitle><JournalTitle>Ecol Lett</JournalTitle><VolumeID>3</VolumeID><FirstPage>362</FirstPage><LastPage>377</LastPage></BibArticle><BibUnstructured>Bohannan BJM, Lenski RE. Linking genetic change to community evolution: insights from studies of bacteria and bacteriophage. Ecol Lett. 2000;3:362–77.</BibUnstructured></Citation><Citation ID="CR20"><CitationNumber>20.</CitationNumber><BibArticle><BibAuthorName><Initials>PH</Initials><FamilyName>Thrall</FamilyName></BibAuthorName><BibAuthorName><Initials>JJ</Initials><FamilyName>Burdon</FamilyName></BibAuthorName><Year>2003</Year><ArticleTitle Language="En">Evolution of virulence in a plant host-pathogen metapopulation</ArticleTitle><JournalTitle>Science</JournalTitle><VolumeID>299</VolumeID><FirstPage>1735</FirstPage><LastPage>1737</LastPage></BibArticle><BibUnstructured>Thrall PH, Burdon JJ. Evolution of virulence in a plant host-pathogen metapopulation. Science. 2003;299:1735–7.</BibUnstructured></Citation><Citation ID="CR21"><CitationNumber>21.</CitationNumber><BibArticle><BibAuthorName><Initials>AR</Initials><FamilyName>Hall</FamilyName></BibAuthorName><BibAuthorName><Initials>PD</Initials><FamilyName>Scanlan</FamilyName></BibAuthorName><BibAuthorName><Initials>A</Initials><FamilyName>Buckling</FamilyName></BibAuthorName><Year>2011</Year><ArticleTitle Language="En">Bacteria-phage coevolution and the emergence of generalist pathogens</ArticleTitle><JournalTitle>Am Nat</JournalTitle><VolumeID>177</VolumeID><FirstPage>44</FirstPage><LastPage>53</LastPage></BibArticle><BibUnstructured>Hall AR, Scanlan PD, Buckling A. Bacteria-phage coevolution and the emergence of generalist pathogens. Am Nat. 2011;177:44–53.</BibUnstructured></Citation><Citation ID="CR22"><CitationNumber>22.</CitationNumber><BibArticle><BibAuthorName><Initials>S</Initials><FamilyName>Rigali</FamilyName></BibAuthorName><BibAuthorName><Initials>F</Initials><FamilyName>Titgemeyer</FamilyName></BibAuthorName><BibAuthorName><Initials>S</Initials><FamilyName>Barends</FamilyName></BibAuthorName><BibAuthorName><Initials>S</Initials><FamilyName>Mulder</FamilyName></BibAuthorName><BibAuthorName><Initials>AW</Initials><FamilyName>Thomae</FamilyName></BibAuthorName><BibAuthorName><Initials>DA</Initials><FamilyName>Hopwood</FamilyName></BibAuthorName><Etal/><Year>2008</Year><ArticleTitle Language="En">Feast or famine: the global regulator DasR links nutrient stress to antibiotic production by Streptomyces</ArticleTitle><JournalTitle>EMBO Rep</JournalTitle><VolumeID>9</VolumeID><FirstPage>670</FirstPage><LastPage>675</LastPage></BibArticle><BibUnstructured>Rigali S, Titgemeyer F, Barends S, Mulder S, Thomae AW, Hopwood DA, et al. Feast or famine: the global regulator DasR links nutrient stress to antibiotic production by Streptomyces. EMBO Rep. 2008;9:670–5.</BibUnstructured></Citation><Citation ID="CR23"><CitationNumber>23.</CitationNumber><BibArticle><BibAuthorName><Initials>S</Initials><FamilyName>Sánchez</FamilyName></BibAuthorName><BibAuthorName><Initials>A</Initials><FamilyName>Chávez</FamilyName></BibAuthorName><BibAuthorName><Initials>A</Initials><FamilyName>Forero</FamilyName></BibAuthorName><BibAuthorName><Initials>Y</Initials><FamilyName>García-Huante</FamilyName></BibAuthorName><BibAuthorName><Initials>A</Initials><FamilyName>Romero</FamilyName></BibAuthorName><BibAuthorName><Initials>M</Initials><FamilyName>Sánchez</FamilyName></BibAuthorName><Etal/><Year>2010</Year><ArticleTitle Language="En">Carbon source regulation of antibiotic production</ArticleTitle><JournalTitle>J Antibiot</JournalTitle><VolumeID>63</VolumeID><FirstPage>442</FirstPage><LastPage>459</LastPage></BibArticle><BibUnstructured>Sánchez S, Chávez A, Forero A, García-Huante Y, Romero A, Sánchez M, et al. Carbon source regulation of antibiotic production. J Antibiot. 2010;63:442–59.</BibUnstructured></Citation><Citation ID="CR24"><CitationNumber>24.</CitationNumber><BibArticle><BibAuthorName><Initials>GP</Initials><FamilyName>Wezel</FamilyName><Particle>Van</Particle></BibAuthorName><BibAuthorName><Initials>KJ</Initials><FamilyName>McDowall</FamilyName></BibAuthorName><Year>2011</Year><ArticleTitle Language="En">The regulation of the secondary metabolism of <Emphasis Type="Italic">Streptomyces</Emphasis>: new links and experimental advances</ArticleTitle><JournalTitle>Nat Prod Rep</JournalTitle><VolumeID>28</VolumeID><FirstPage>1311</FirstPage></BibArticle><BibUnstructured>Van Wezel GP, McDowall KJ. The regulation of the secondary metabolism of <Emphasis Type="Italic">Streptomyces</Emphasis>: new links and experimental advances. Nat Prod Rep. 2011;28:1311.</BibUnstructured></Citation><Citation ID="CR25"><CitationNumber>25.</CitationNumber><BibArticle><BibAuthorName><Initials>DC</Initials><FamilyName>Schlatter</FamilyName></BibAuthorName><BibAuthorName><Initials>AL</Initials><FamilyName>DavelosBaines</FamilyName></BibAuthorName><BibAuthorName><Initials>K</Initials><FamilyName>Xiao</FamilyName></BibAuthorName><BibAuthorName><Initials>LL</Initials><FamilyName>Kinkel</FamilyName></BibAuthorName><Year>2013</Year><ArticleTitle Language="En">Resource use of soilborne <Emphasis Type="Italic">Streptomyces</Emphasis> varies with location, phylogeny, and nitrogen amendment</ArticleTitle><JournalTitle>Microb Ecol</JournalTitle><VolumeID>99</VolumeID><FirstPage>961</FirstPage><LastPage>971</LastPage></BibArticle><BibUnstructured>Schlatter DC, DavelosBaines AL, Xiao K, Kinkel LL. Resource use of soilborne <Emphasis Type="Italic">Streptomyces</Emphasis> varies with location, phylogeny, and nitrogen amendment. Microb Ecol. 2013;99:961–71.</BibUnstructured></Citation><Citation ID="CR26"><CitationNumber>26.</CitationNumber><BibArticle><BibAuthorName><Initials>AL</Initials><FamilyName>Davelos</FamilyName></BibAuthorName><BibAuthorName><Initials>K</Initials><FamilyName>Xiao</FamilyName></BibAuthorName><BibAuthorName><Initials>JM</Initials><FamilyName>Flor</FamilyName></BibAuthorName><BibAuthorName><Initials>LL</Initials><FamilyName>Kinkel</FamilyName></BibAuthorName><Year>2004</Year><ArticleTitle Language="En">Genetic and phenotypic traits of streptomycetes used to characterize antibiotic activities of field-collected microbes</ArticleTitle><JournalTitle>Can J Microbiol</JournalTitle><VolumeID>50</VolumeID><FirstPage>79</FirstPage><LastPage>89</LastPage></BibArticle><BibUnstructured>Davelos AL, Xiao K, Flor JM, Kinkel LL. Genetic and phenotypic traits of streptomycetes used to characterize antibiotic activities of field-collected microbes. Can J Microbiol. 2004;50:79–89.</BibUnstructured></Citation><Citation ID="CR27"><CitationNumber>27.</CitationNumber><BibUnstructured>R Core Team. R: a language and environment for statistical computing. R Foundation for Statistical Computing, Vienna, Austria. ISBN 3-900051-07-0, URL <ExternalRef><RefSource>http://www.R-project.org/</RefSource><RefTarget TargetType="URL" Address="http://www.r-project.org/"/></ExternalRef>. 2013.</BibUnstructured></Citation><Citation ID="CR28"><CitationNumber>28.</CitationNumber><BibArticle><BibAuthorName><Initials>T</Initials><FamilyName>Hothorn</FamilyName></BibAuthorName><BibAuthorName><Initials>K</Initials><FamilyName>Hornik</FamilyName></BibAuthorName><BibAuthorName><Initials>MA</Initials><FamilyName>Wiel</FamilyName><Particle>van de</Particle></BibAuthorName><BibAuthorName><Initials>A</Initials><FamilyName>Zeilies</FamilyName></BibAuthorName><Year>2008</Year><ArticleTitle Language="En">Implementing a class of permutation tests; the coin package</ArticleTitle><JournalTitle>J Stat Softw</JournalTitle><VolumeID>28</VolumeID><FirstPage>1</FirstPage><LastPage>23</LastPage></BibArticle><BibUnstructured>Hothorn T, Hornik K, van de Wiel MA, Zeilies A. Implementing a class of permutation tests; the coin package. J Stat Softw. 2008;28:1–23.</BibUnstructured></Citation><Citation ID="CR29"><CitationNumber>29.</CitationNumber><BibArticle><BibAuthorName><Initials>K</Initials><FamilyName>Vetsigian</FamilyName></BibAuthorName><BibAuthorName><Initials>R</Initials><FamilyName>Jajoo</FamilyName></BibAuthorName><BibAuthorName><Initials>R</Initials><FamilyName>Kishony</FamilyName></BibAuthorName><Year>2011</Year><ArticleTitle Language="En">Structure and evolution of Streptomyces interaction networks in soil and in silico</ArticleTitle><JournalTitle>PLoS Biol</JournalTitle><VolumeID>9</VolumeID><FirstPage>e1001184</FirstPage></BibArticle><BibUnstructured>Vetsigian K, Jajoo R, Kishony R. Structure and evolution of Streptomyces interaction networks in soil and in silico. PLoS Biol. 2011;9:e1001184.</BibUnstructured></Citation><Citation ID="CR30"><CitationNumber>30.</CitationNumber><BibArticle><BibAuthorName><Initials>K</Initials><FamilyName>Bhullar</FamilyName></BibAuthorName><BibAuthorName><Initials>N</Initials><FamilyName>Waglechner</FamilyName></BibAuthorName><BibAuthorName><Initials>A</Initials><FamilyName>Pawlowski</FamilyName></BibAuthorName><BibAuthorName><Initials>K</Initials><FamilyName>Koteva</FamilyName></BibAuthorName><BibAuthorName><Initials>ED</Initials><FamilyName>Banks</FamilyName></BibAuthorName><BibAuthorName><Initials>MD</Initials><FamilyName>Johnston</FamilyName></BibAuthorName><Etal/><Year>2012</Year><ArticleTitle Language="En">Antibiotic resistance is prevalent in an isolated cave microbiome</ArticleTitle><JournalTitle>PLoS ONE</JournalTitle><VolumeID>7</VolumeID><FirstPage>e34953</FirstPage></BibArticle><BibUnstructured>Bhullar K, Waglechner N, Pawlowski A, Koteva K, Banks ED, Johnston MD, et al. Antibiotic resistance is prevalent in an isolated cave microbiome. PLoS ONE. 2012;7:e34953.</BibUnstructured></Citation><Citation ID="CR31"><CitationNumber>31.</CitationNumber><BibArticle><BibAuthorName><Initials>PJ</Initials><FamilyName>Yeh</FamilyName></BibAuthorName><BibAuthorName><Initials>MJ</Initials><FamilyName>Hegreness</FamilyName></BibAuthorName><BibAuthorName><Initials>AP</Initials><FamilyName>Aiden</FamilyName></BibAuthorName><BibAuthorName><Initials>R</Initials><FamilyName>Kishony</FamilyName></BibAuthorName><Year>2009</Year><ArticleTitle Language="En">Drug interactions and the evolution of antibiotic resistance</ArticleTitle><JournalTitle>Nat Rev Microbiol</JournalTitle><VolumeID>7</VolumeID><FirstPage>460</FirstPage><LastPage>466</LastPage></BibArticle><BibUnstructured>Yeh PJ, Hegreness MJ, Aiden AP, Kishony R. Drug interactions and the evolution of antibiotic resistance. Nat Rev Microbiol. 2009;7:460–6.</BibUnstructured></Citation><Citation ID="CR32"><CitationNumber>32.</CitationNumber><BibArticle><BibAuthorName><Initials>MJ</Initials><FamilyName>Bibb</FamilyName></BibAuthorName><Year>2005</Year><ArticleTitle Language="En">Regulation of secondary metabolism in streptomycetes</ArticleTitle><JournalTitle>Curr Opin Microbiol</JournalTitle><VolumeID>8</VolumeID><FirstPage>208</FirstPage><LastPage>215</LastPage></BibArticle><BibUnstructured>Bibb MJ. Regulation of secondary metabolism in streptomycetes. Curr Opin Microbiol. 2005;8:208–15.</BibUnstructured></Citation><Citation ID="CR33"><CitationNumber>33.</CitationNumber><BibArticle><BibAuthorName><Initials>E</Initials><FamilyName>Takano</FamilyName></BibAuthorName><Year>2006</Year><ArticleTitle Language="En">Gamma-butyrolactones: Streptomyces signalling molecules regulating antibiotic production and differentiation</ArticleTitle><JournalTitle>Curr Opin Microbiol</JournalTitle><VolumeID>9</VolumeID><FirstPage>287</FirstPage><LastPage>294</LastPage></BibArticle><BibUnstructured>Takano E. Gamma-butyrolactones: Streptomyces signalling molecules regulating antibiotic production and differentiation. Curr Opin Microbiol. 2006;9:287–94.</BibUnstructured></Citation><Citation ID="CR34"><CitationNumber>34.</CitationNumber><BibArticle><BibAuthorName><Initials>NH</Initials><FamilyName>Hsiao</FamilyName></BibAuthorName><BibAuthorName><Initials>S</Initials><FamilyName>Nakayama</FamilyName></BibAuthorName><BibAuthorName><Initials>ME</Initials><FamilyName>Merlo</FamilyName></BibAuthorName><BibAuthorName><Initials>M</Initials><FamilyName>Vries</FamilyName><Particle>de</Particle></BibAuthorName><BibAuthorName><Initials>R</Initials><FamilyName>Bunet</FamilyName></BibAuthorName><BibAuthorName><Initials>S</Initials><FamilyName>Kitani</FamilyName></BibAuthorName><Etal/><Year>2009</Year><ArticleTitle Language="En">Analysis of two additional signaling molecules in Streptomyces coelicolor and the development of a butyrolactone-specific reporter system</ArticleTitle><JournalTitle>Chem Biol</JournalTitle><VolumeID>16</VolumeID><FirstPage>951</FirstPage><LastPage>960</LastPage></BibArticle><BibUnstructured>Hsiao NH, Nakayama S, Merlo ME, de Vries M, Bunet R, Kitani S, et al. Analysis of two additional signaling molecules in Streptomyces coelicolor and the development of a butyrolactone-specific reporter system. Chem Biol. 2009;16:951–60.</BibUnstructured></Citation><Citation ID="CR35"><CitationNumber>35.</CitationNumber><BibArticle><BibAuthorName><Initials>S</Initials><FamilyName>Kitani</FamilyName></BibAuthorName><BibAuthorName><Initials>KT</Initials><FamilyName>Miyamoto</FamilyName></BibAuthorName><BibAuthorName><Initials>S</Initials><FamilyName>Takamatsu</FamilyName></BibAuthorName><BibAuthorName><Initials>E</Initials><FamilyName>Herawati</FamilyName></BibAuthorName><BibAuthorName><Initials>H</Initials><FamilyName>Iguchi</FamilyName></BibAuthorName><BibAuthorName><Initials>K</Initials><FamilyName>Nishitomi</FamilyName></BibAuthorName><Etal/><Year>2011</Year><ArticleTitle Language="En">Avenolide, a Streptomyces hormone controlling antibiotic production in Streptomyces avermitilis</ArticleTitle><JournalTitle>Proc Natl Acad Sci U S A</JournalTitle><VolumeID>108</VolumeID><FirstPage>16410</FirstPage><LastPage>16415</LastPage></BibArticle><BibUnstructured>Kitani S, Miyamoto KT, Takamatsu S, Herawati E, Iguchi H, Nishitomi K, et al. Avenolide, a Streptomyces hormone controlling antibiotic production in Streptomyces avermitilis. Proc Natl Acad Sci U S A. 2011;108:16410–5.</BibUnstructured></Citation><Citation ID="CR36"><CitationNumber>36.</CitationNumber><BibArticle><BibAuthorName><Initials>BR</Initials><FamilyName>Levin</FamilyName></BibAuthorName><BibAuthorName><Initials>V</Initials><FamilyName>Perrot</FamilyName></BibAuthorName><BibAuthorName><Initials>N</Initials><FamilyName>Walker</FamilyName></BibAuthorName><Year>2000</Year><ArticleTitle Language="En">Compensatory mutations, antibiotic resistance, and the population genetics of adaptive evolution in bacteria</ArticleTitle><JournalTitle>Genetics</JournalTitle><VolumeID>154</VolumeID><FirstPage>985</FirstPage><LastPage>97</LastPage></BibArticle><BibUnstructured>Levin BR, Perrot V, Walker N. Compensatory mutations, antibiotic resistance, and the population genetics of adaptive evolution in bacteria. Genetics. 2000;154:985–97.</BibUnstructured></Citation><Citation ID="CR37"><CitationNumber>37.</CitationNumber><BibArticle><BibAuthorName><Initials>R</Initials><FamilyName>Craig MacLean</FamilyName></BibAuthorName><BibAuthorName><Initials>AR</Initials><FamilyName>Hall</FamilyName></BibAuthorName><BibAuthorName><Initials>GG</Initials><FamilyName>Perron</FamilyName></BibAuthorName><BibAuthorName><Initials>A</Initials><FamilyName>Buckling</FamilyName></BibAuthorName><Year>2010</Year><ArticleTitle Language="En">The population genetics of antibiotic resistance: integrating molecular mechanisms and treatment contexts</ArticleTitle><JournalTitle>Nat Rev Genet</JournalTitle><VolumeID>11</VolumeID><FirstPage>405</FirstPage><LastPage>414</LastPage></BibArticle><BibUnstructured>Craig MacLean R, Hall AR, Perron GG, Buckling A. The population genetics of antibiotic resistance: integrating molecular mechanisms and treatment contexts. Nat Rev Genet. 2010;11:405–14.</BibUnstructured></Citation><Citation ID="CR38"><CitationNumber>38.</CitationNumber><BibArticle><BibAuthorName><Initials>T</Initials><FamilyName>Vogwill</FamilyName></BibAuthorName><BibAuthorName><Initials>R</Initials><FamilyName>Craig MacLean</FamilyName></BibAuthorName><Year>2015</Year><ArticleTitle Language="En">The genetic basis of the fitness costs of antimicrobial resistance: a meta-analysis approach</ArticleTitle><JournalTitle>Evol Appl</JournalTitle><VolumeID>8</VolumeID><FirstPage>284</FirstPage><LastPage>295</LastPage></BibArticle><BibUnstructured>Vogwill T, Craig MacLean R. The genetic basis of the fitness costs of antimicrobial resistance: a meta-analysis approach. Evol Appl. 2015;8:284–95.</BibUnstructured></Citation><Citation ID="CR39"><CitationNumber>39.</CitationNumber><BibArticle><BibAuthorName><Initials>H</Initials><FamilyName>Ward</FamilyName></BibAuthorName><BibAuthorName><Initials>GG</Initials><FamilyName>Perron</FamilyName></BibAuthorName><BibAuthorName><Initials>RC</Initials><FamilyName>Maclean</FamilyName></BibAuthorName><Year>2009</Year><ArticleTitle Language="En">The cost of multiple drug resistance in <Emphasis Type="Italic">Pseudomonas aeruginosa</Emphasis></ArticleTitle><JournalTitle>J Evol Biol</JournalTitle><VolumeID>22</VolumeID><FirstPage>997</FirstPage><LastPage>1003</LastPage></BibArticle><BibUnstructured>Ward H, Perron GG, Maclean RC. The cost of multiple drug resistance in <Emphasis Type="Italic">Pseudomonas aeruginosa</Emphasis>. J Evol Biol. 2009;22:997–1003.</BibUnstructured></Citation><Citation ID="CR40"><CitationNumber>40.</CitationNumber><BibArticle><BibAuthorName><Initials>DC</Initials><FamilyName>Angst</FamilyName></BibAuthorName><BibAuthorName><Initials>AR</Initials><FamilyName>Hall</FamilyName></BibAuthorName><Year>2013</Year><ArticleTitle Language="En">The cost of antibiotic resistance depends on evolutionary history in <Emphasis Type="Italic">Escherichia coli</Emphasis></ArticleTitle><JournalTitle>BMC Evol Biol</JournalTitle><VolumeID>13</VolumeID><FirstPage>163</FirstPage></BibArticle><BibUnstructured>Angst DC, Hall AR. The cost of antibiotic resistance depends on evolutionary history in <Emphasis Type="Italic">Escherichia coli</Emphasis>. BMC Evol Biol. 2013;13:163.</BibUnstructured></Citation><Citation ID="CR41"><CitationNumber>41.</CitationNumber><BibArticle><BibAuthorName><Initials>GC</Initials><FamilyName>Marshall</FamilyName></BibAuthorName><BibAuthorName><Initials>G</Initials><FamilyName>Broadhead</FamilyName></BibAuthorName><BibAuthorName><Initials>BK</Initials><FamilyName>Leskiw</FamilyName></BibAuthorName><BibAuthorName><Initials>GD</Initials><FamilyName>Wright</FamilyName></BibAuthorName><Year>1997</Year><ArticleTitle Language="En">D-Ala-D-Ala ligases from glycopeptide antibiotic-producing organisms are highly homologous to the enterococcal vancomycin-resistance ligases VanA and VanB</ArticleTitle><JournalTitle>Proc Natl Acad Sci U S A</JournalTitle><VolumeID>94</VolumeID><FirstPage>6480</FirstPage><LastPage>6483</LastPage></BibArticle><BibUnstructured>Marshall GC, Broadhead G, Leskiw BK, Wright GD. D-Ala-D-Ala ligases from glycopeptide antibiotic-producing organisms are highly homologous to the enterococcal vancomycin-resistance ligases VanA and VanB. Proc Natl Acad Sci U S A. 1997;94:6480–3.</BibUnstructured></Citation><Citation ID="CR42"><CitationNumber>42.</CitationNumber><BibArticle><BibAuthorName><Initials>P</Initials><FamilyName>Sander</FamilyName></BibAuthorName><BibAuthorName><Initials>B</Initials><FamilyName>Springer</FamilyName></BibAuthorName><BibAuthorName><Initials>T</Initials><FamilyName>Prammananan</FamilyName></BibAuthorName><BibAuthorName><Initials>A</Initials><FamilyName>Sturmfels</FamilyName></BibAuthorName><BibAuthorName><Initials>M</Initials><FamilyName>Kappler</FamilyName></BibAuthorName><BibAuthorName><Initials>M</Initials><FamilyName>Pletschette</FamilyName></BibAuthorName><Etal/><Year>2002</Year><ArticleTitle Language="En">Fitness cost of chromosomal drug resistance-conferring mutations</ArticleTitle><JournalTitle>Antimicrob Agents Chemother</JournalTitle><VolumeID>46</VolumeID><FirstPage>1204</FirstPage><LastPage>1211</LastPage></BibArticle><BibUnstructured>Sander P, Springer B, Prammananan T, Sturmfels A, Kappler M, Pletschette M, et al. Fitness cost of chromosomal drug resistance-conferring mutations. Antimicrob Agents Chemother. 2002;46:1204–11.</BibUnstructured></Citation></Bibliography></ArticleBackmatter></Article>
